# Supplementary material
Source: PubMed Central journal article supplement (PMC10304650)
Supplement: NIHMS1904561-supplement-SM-final.pdf [file NIHMS1904561-supplement-SM-final.pdf]

# Supporting Information

## Structure-Based Development of Isoform Selective Inhibitors of Casein Kinase 1 $\epsilon$ vs. Casein Kinase 1 $\delta$

Jun Yong Choi<sup>1,3,4,\*</sup>, Yoshihiko Noguchi<sup>1</sup>, James M. Alburger<sup>1</sup>, Simon Bayle<sup>6</sup>, Eugene Chung<sup>3</sup>, Wayne Grant<sup>2</sup>, Apirat Chaikuad<sup>5,7</sup>, Stefan Knapp<sup>5,7</sup>, Derek R. Duckett<sup>6</sup>, and William R. Roush<sup>1,\*</sup>

<sup>1</sup>Department of Chemistry and <sup>2</sup>Department of Molecular Therapeutics, The Scripps Research Institute, Scripps Florida, Jupiter, Florida 33458, United States

<sup>3</sup>Department of Chemistry and Biochemistry, Queens College, Queens, NY 11367, United States

<sup>4</sup>Ph.D. Programs in Chemistry and Biochemistry, The Graduate Center of the City University of New York, New York, NY 10016, United States

<sup>5</sup>Institute of Pharmaceutical Chemistry, Goethe University, Frankfurt am Main 60438, Germany

<sup>6</sup>Department of Drug Discovery, Moffitt Cancer Center, Florida 33612, United States

<sup>7</sup>Structural Genomics Consortium, BMLS, Goethe University, Frankfurt am Main 60438, Germany

\*To whom correspondence should be addressed. (W.R.R) e-mail: [roush@scripps.edu](mailto:roush@scripps.edu); (J.Y.C) e-mail:

[junyong.choi@qc.cuny.edu](mailto:junyong.choi@qc.cuny.edu)

| Table of Contents                                                                                                                                                                                               | Page Nr. |
|-----------------------------------------------------------------------------------------------------------------------------------------------------------------------------------------------------------------|----------|
| I. Supplemental Tables and Figures for X-ray data collection, sequence alignment, biochemical assay, KINOME profiling, protein expression in bladder cells, and the electrostatic potential surface of ligands. | S2       |
| II. Procedures for the synthesis of inhibitors and spectroscopic analyses                                                                                                                                       | S17      |
| III. HPLC trace for SR-4133                                                                                                                                                                                     | S49      |
| IV. Molecular Formula Strings                                                                                                                                                                                   | S50      |
| V. References                                                                                                                                                                                                   | S51      |

**Table S1. X-ray data collection and refinement statistics (CK1δ-SR-3029 & CK1δ-SR-4133)**

| <b>Complex</b>                                  | <b>CK1d - SR3029</b>                                                                                  | <b>CK1d - SR4133</b>                                                                                  |
|-------------------------------------------------|-------------------------------------------------------------------------------------------------------|-------------------------------------------------------------------------------------------------------|
| <b>PDB accession code</b>                       | <b>6RCG</b>                                                                                           | <b>6RCH</b>                                                                                           |
| <b>Data Collection</b>                          |                                                                                                       |                                                                                                       |
| Resolution <sup>a</sup> (Å)                     | 29.92-1.40 (1.48-1.40)                                                                                | 19.72-1.45 (1.53-1.45)                                                                                |
| Spacegroup                                      | <i>C</i> 2                                                                                            | <i>P</i> 2 <sub>1</sub>                                                                               |
| Cell dimensions                                 | <i>a</i> = 88.0, <i>b</i> = 53.6, <i>c</i> = 72.2 Å<br><i>α</i> , <i>γ</i> = 90.0°, <i>β</i> = 113.5° | <i>a</i> = 49.1, <i>b</i> = 74.1, <i>c</i> = 89.0 Å<br><i>α</i> , <i>γ</i> = 90.0°, <i>β</i> = 103.2° |
| No. unique reflections <sup>a</sup>             | 58,592 (8,620)                                                                                        | 108,708 (15,481)                                                                                      |
| Completeness <sup>a</sup> (%)                   | 96.7 (97.5)                                                                                           | 99.0 (97.1)                                                                                           |
| <i>I</i> / <i>σ</i> <sup>a</sup>                | 12.0 (2.4)                                                                                            | 6.5 (3.1)                                                                                             |
| <i>R</i> <sub>merge</sub> <sup>a</sup> (%)      | 0.051 (0.462)                                                                                         | 0.171 (0.439)                                                                                         |
| CC (1/2)                                        | 0.998 (0.870)                                                                                         | 0.978 (0.858)                                                                                         |
| Redundancy <sup>a</sup>                         | 3.6 (3.5)                                                                                             | 5.7 (5.4)                                                                                             |
| <b>Refinement</b>                               |                                                                                                       |                                                                                                       |
| No. atoms in refinement                         | 2,456/ 70/ 389                                                                                        | 4,915/ 38/ 841                                                                                        |
| B factor (P/L/O) <sup>b</sup> (Å <sup>2</sup> ) | 22/ 18/ 35                                                                                            | 14/ 17/ 28                                                                                            |
| <i>R</i> <sub>fact</sub> (%)                    | 14.2                                                                                                  | 15.5                                                                                                  |
| <i>R</i> <sub>free</sub> (%)                    | 18.5                                                                                                  | 17.8                                                                                                  |
| rms deviation bond <sup>c</sup> (Å)             | 0.016                                                                                                 | 0.016                                                                                                 |
| rms deviation angle <sup>c</sup> (°)            | 1.7                                                                                                   | 1.6                                                                                                   |
| <b>Molprobit Ramachandran</b>                   |                                                                                                       |                                                                                                       |
| Favour (%)                                      | 98.29                                                                                                 | 98.28                                                                                                 |
| Outlier (%)                                     | 0                                                                                                     | 0                                                                                                     |

<sup>a</sup> Values in brackets show the statistics for the highest resolution shells.

<sup>b</sup> P/L/O indicate protein, ligand molecule, and other (water and solvent molecules), respectively.

<sup>c</sup> rms indicates root-mean-square.



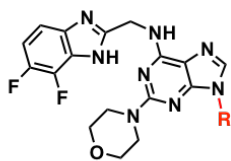

| IC <sub>50</sub> (nM) | SR3029  | SR4133  | SR4310  |
|-----------------------|---------|---------|---------|
| R =                   |         |         |         |
| CK1 $\alpha$          | >10,000 | >10,000 | >10,000 |
| CK1 $\gamma$ 1        | >10,000 | >10,000 | >10,000 |
| CK1 $\gamma$ 2        | >10,000 | >10,000 | >10,000 |
| CK1 $\gamma$ 3        | >10,000 | >10,000 | >10,000 |
| CK1 $\delta$          | 44      | >10,000 | 1,670   |
| CK1 $\epsilon$        | 260     | 61      | 160     |

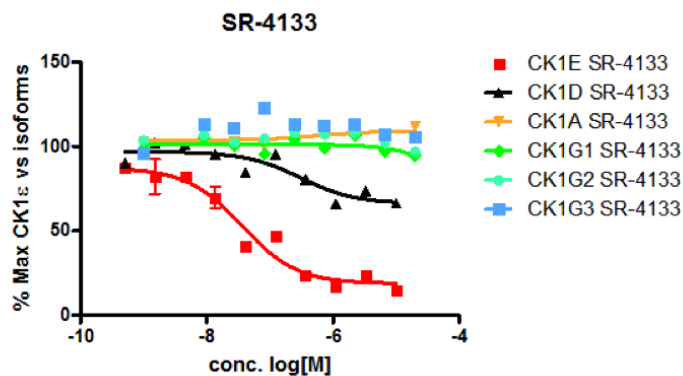

**Figure S2. Specificity of SR-4133 to CK1 $\epsilon$  vs. CK1 isoforms. SR-4133 and SR-4310 were assayed to CK1 $\alpha$ , CK1 $\gamma$ 1, CK1 $\gamma$ 2, and CK1 $\gamma$ 3 by Reaction Biology Kinase Assay Services.**

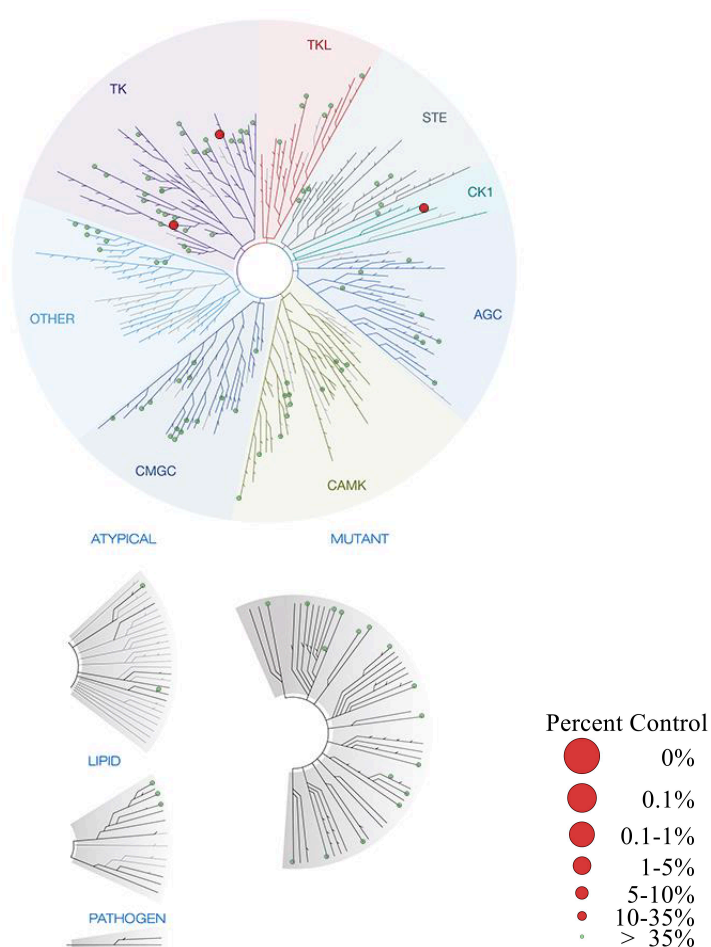

**Figure S3. Specificity of SR-4133 to CK1 $\epsilon$  vs. 97 human kinome from the KINOMEScan profiling assay at 10  $\mu$ M.**

**Table S2. Selectivity profiling data for SR-4133**

| Enzyme                     | Percent activity remaining when dosed with<br>10 $\mu$ M SR-4133 |
|----------------------------|------------------------------------------------------------------|
| ABL1(E255K)-phosphorylated | 66                                                               |
| ABL1(T315I)-phosphorylated | 83                                                               |
| ABL1-nonphosphorylated     | 87                                                               |
| ABL1-phosphorylated        | 76                                                               |
| ACVR1B                     | 73                                                               |
| ADCK3                      | 100                                                              |
| AKT1                       | 100                                                              |
| AKT2                       | 90                                                               |
| ALK                        | 97                                                               |
| AURKA                      | 76                                                               |
| AURKB                      | 73                                                               |
| AXL                        | 95                                                               |
| BMPR2                      | 78                                                               |
| BRAF                       | 84                                                               |
| BRAF(V600E)                | 74                                                               |
| BTK                        | 76                                                               |
| CDK11                      | 86                                                               |
| CDK2                       | 84                                                               |
| CDK3                       | 100                                                              |
| CDK7                       | 67                                                               |
| CDK9                       | 79                                                               |
| CHEK1                      | 90                                                               |
| CSF1R                      | 80                                                               |
| CSNK1D                     | 30                                                               |
| CSNK1G2                    | 76                                                               |
| DCAMKL1                    | 62                                                               |
| DYRK1B                     | 78                                                               |
| EGFR                       | 73                                                               |

|                           |     |
|---------------------------|-----|
| EGFR(L858R)               | 90  |
| EPHA2                     | 74  |
| ERBB2                     | 65  |
| ERBB4                     | 95  |
| ERK1                      | 91  |
| FAK                       | 97  |
| FGFR2                     | 93  |
| FGFR3                     | 79  |
| FLT3                      | 41  |
| GSK3B                     | 64  |
| IGF1R                     | 87  |
| IKK-alpha                 | 96  |
| IKK-beta                  | 76  |
| INSR                      | 82  |
| JAK2(JH1domain-catalytic) | 100 |
| JAK3(JH1domain-catalytic) | 95  |
| JNK1                      | 67  |
| JNK2                      | 66  |
| JNK3                      | 55  |
| KIT                       | 62  |
| KIT(D816V)                | 89  |
| KIT(V559D,T670I)          | 83  |
| LKB1                      | 100 |
| MAP3K4                    | 87  |
| MAPKAPK2                  | 100 |
| MARK3                     | 89  |
| MEK1                      | 70  |
| MEK2                      | 91  |
| MET                       | 79  |
| MKNK1                     | 82  |
| MKNK2                     | 78  |
| MLK1                      | 94  |

|                            |     |
|----------------------------|-----|
| p38-alpha                  | 85  |
| p38-beta                   | 85  |
| PAK1                       | 81  |
| PAK2                       | 87  |
| PAK4                       | 95  |
| PCTK1                      | 44  |
| PDGFRA                     | 53  |
| PDGFRB                     | 14  |
| PDPK1                      | 92  |
| PIK3C2B                    | 87  |
| PIK3CA                     | 70  |
| PIK3CG                     | 76  |
| PIM1                       | 98  |
| PIM2                       | 100 |
| PIM3                       | 100 |
| PKAC-alpha                 | 91  |
| PLK1                       | 97  |
| PLK3                       | 71  |
| PLK4                       | 84  |
| PRKCE                      | 84  |
| RAF1                       | 94  |
| RET                        | 93  |
| RIOK2                      | 83  |
| ROCK2                      | 73  |
| RSK2(Kin.Dom.1-N-terminal) | 64  |
| SNARK                      | 86  |
| SRC                        | 90  |
| SRPK3                      | 39  |
| TGFBR1                     | 92  |
| TIE2                       | 71  |
| TRKA                       | 34  |
| TSSK1B                     | 98  |



|                           |     |
|---------------------------|-----|
| TYK2(JH1domain-catalytic) | 100 |
| ULK2                      | 75  |
| VEGFR2                    | 72  |
| YANK3                     | 85  |
| ZAP70                     | 100 |

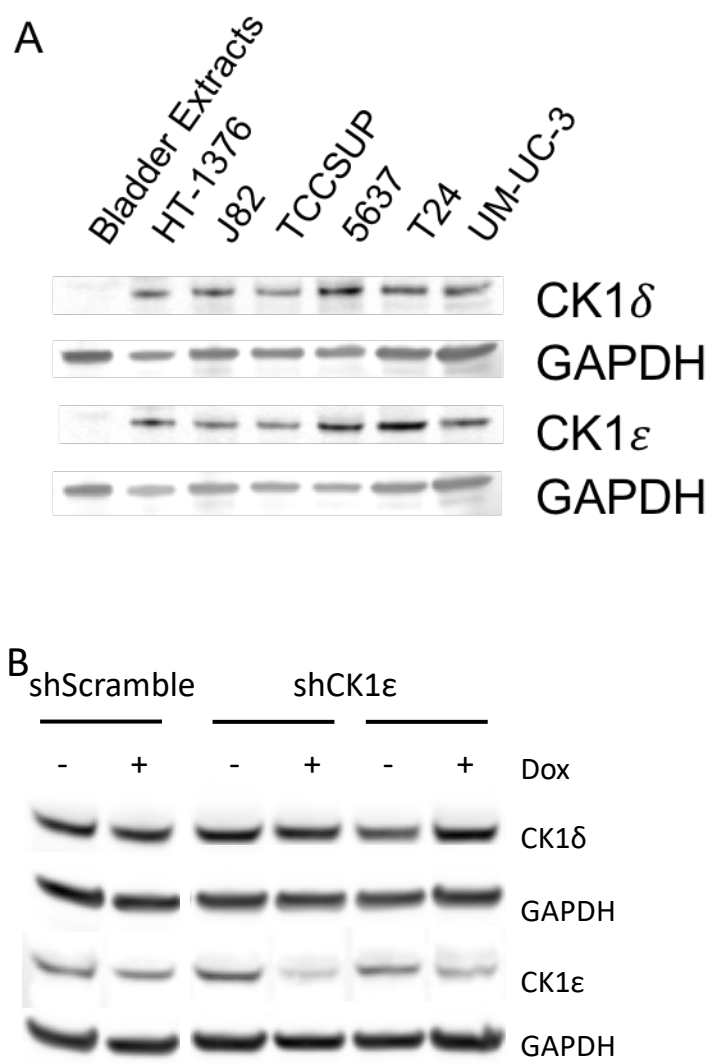

**Figure S4. (A) CK1 $\epsilon$  protein expression in indicated bladder cancer cell lines, (B) CK1 $\delta$  and CK1 $\epsilon$  protein expression in CK1 $\epsilon$  doxycycline inducible knockdown J82 cells with 2 different shRNA. A. The basal expression of CK1 $\epsilon$  was examined by Western blot analysis on a panel of bladder cancer cell lines (HT-1376, J82, TCCSUP, 5637, T24, and UM-UC-3). GAPDH expression was used as a loading control. B. J82 bladder cancer cell line was transduced with doxycycline inducible ShRNA against CK1 $\epsilon$  or scramble sequence (Sc). Knockdown of CK1 $\epsilon$  was confirmed by western blot after 2 days of treatment with 1  $\mu$ g/ml doxycycline.**

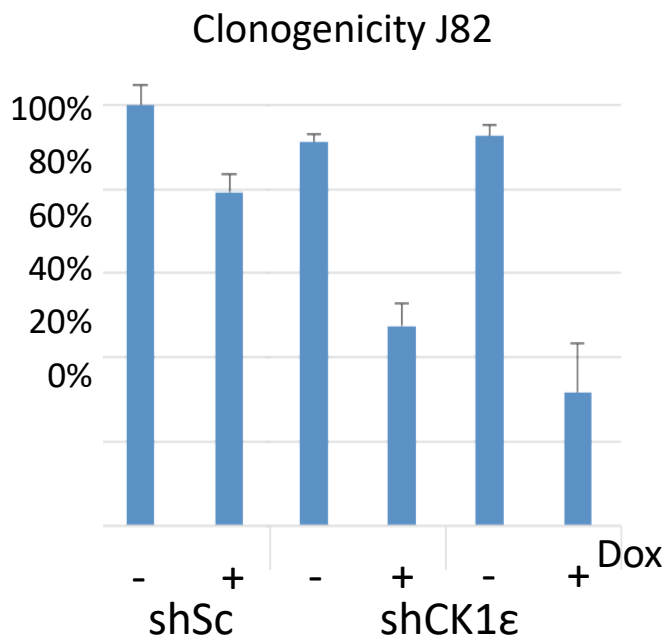

**Figure S5. Clonogenic growth and survival of CK1ε-doxycycline inducible silencing J82 cells. Colony formation assay of cells expressing doxycycline-inducible shRNA against CK1ε and scramble was assessed with 1 μg/ml doxycycline treatment. % of colonies was then calculated depending on the shScramble cell line without doxycycline.**

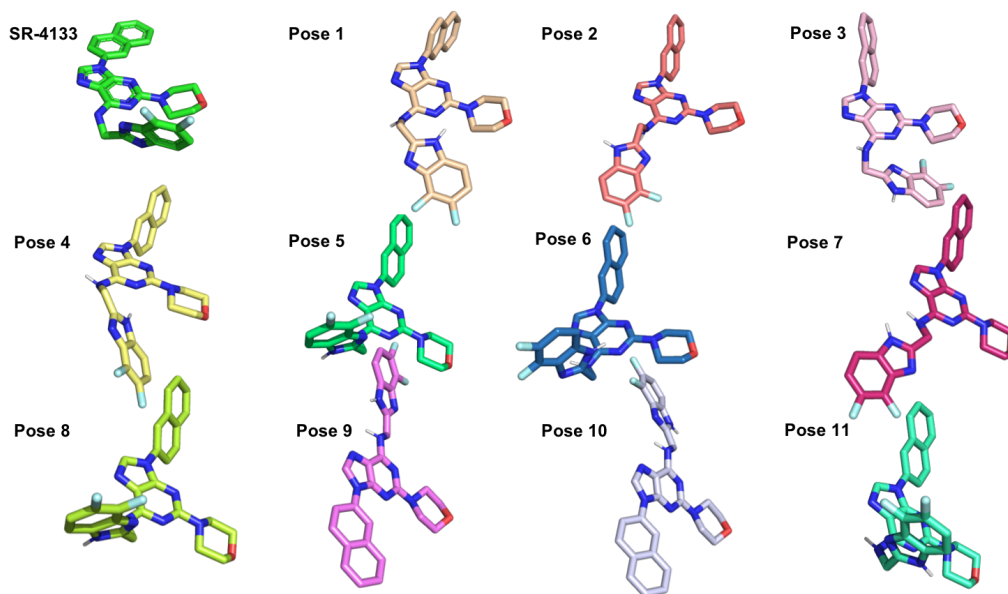

**Figure S6.** The binding poses of SR-4133 in the ATP-binding site of CK1 $\epsilon$  from AutoDock-GPU, which were used for MD simulations. All poses are oriented the same way as the original binding pose of SR-4133 in the X-ray co-crystal structure of CK1 $\delta$ .

**Table S3. MM/GBSA binding affinity energies of 11 poses of SR-4133 complexed in CK1 $\epsilon$ .**

|         | $\Delta G_{\text{binding}}$ (kcal/mol) |
|---------|----------------------------------------|
| Pose 1  | -42.40                                 |
| Pose 2  | -45.24                                 |
| Pose 3  | -42.37                                 |
| Pose 4  | -41.95                                 |
| Pose 5  | -43.29                                 |
| Pose 6  | -40.17                                 |
| Pose 7  | -42.77                                 |
| Pose 8  | -41.01                                 |
| Pose 9  | -35.60                                 |
| Pose 10 | -26.89                                 |
| Pose 11 | -47.02                                 |

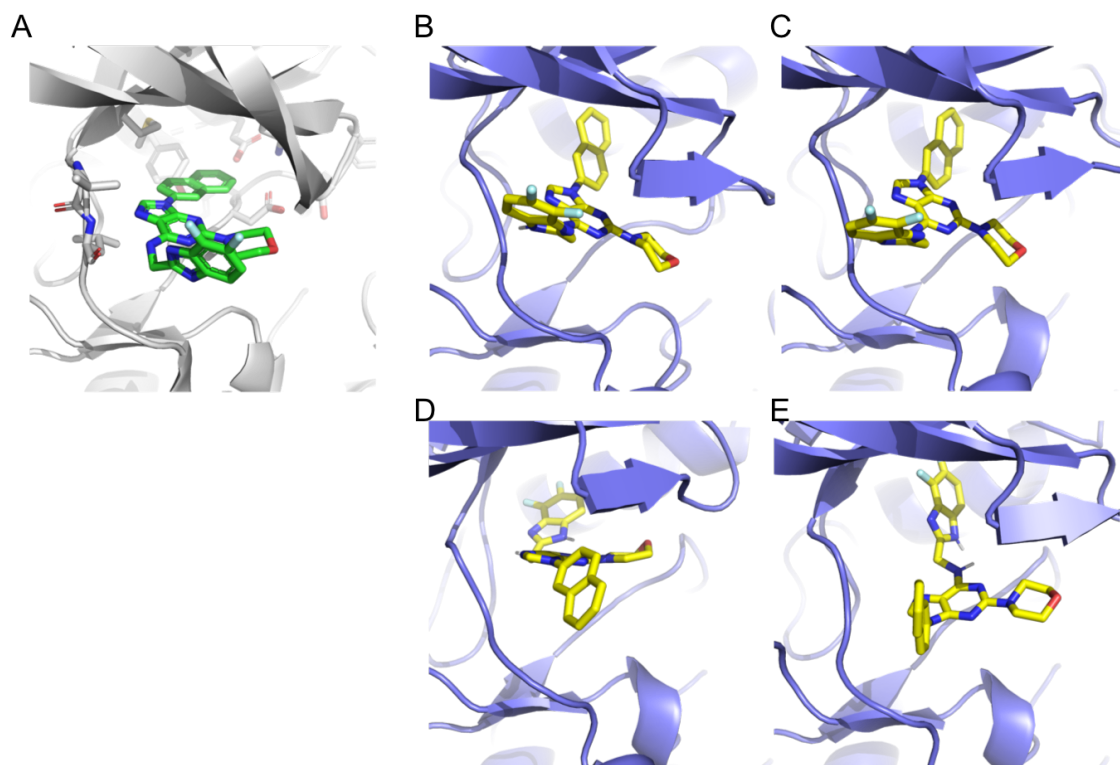

**Figure S7. The binding orientations of SR-4133 in the ATP-binding site of CK1.** (A) The binding orientation of SR-4133 in the X-ray co-crystal structure of CK1 $\delta$  - SR-4133 complex (pdb code: 6RCH); (B) (C) (D) (E) The binding orientations of SR-4133 from 100 ns MD simulations of CK1 $\epsilon$  - SR-4133 complexes obtained from molecular docking studies. Pose 2 (B) and pose 11 (C) have the highest binding affinities in MM/GBSA calculation (Table S3). Pose 9 (D) and pose 10 (E) have the lowest binding affinities in MM/GBSA calculation (Table S3).

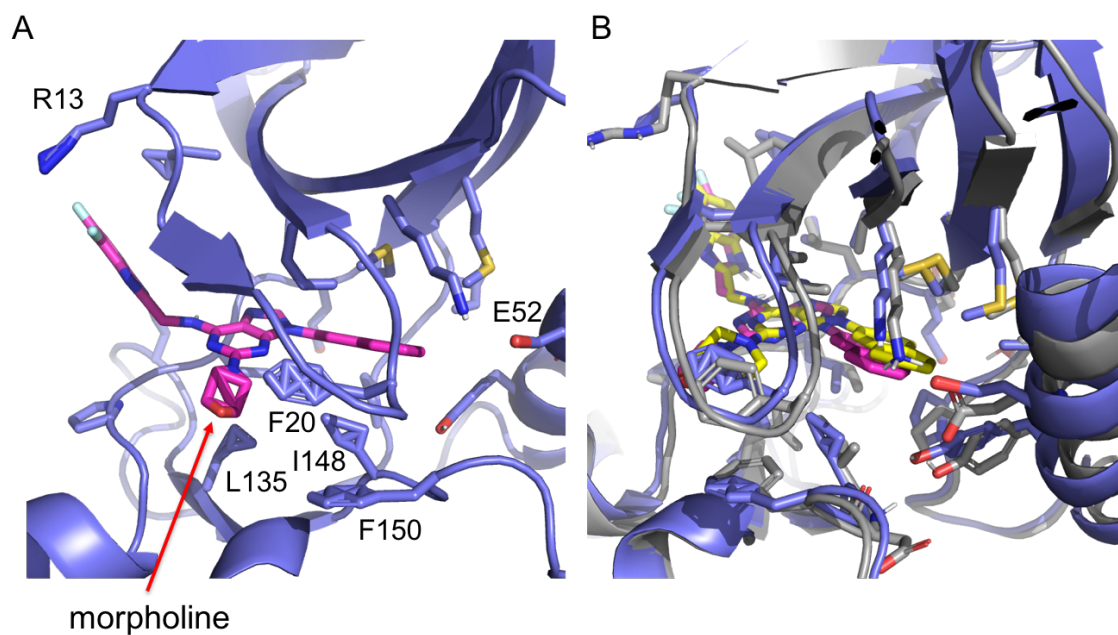

**Figure S8. The averaged structure of CK1 $\epsilon$  - SR-4133 complex from MD simulations (800 ns – 1  $\mu$ s). (A) and its overlay to the structure with the lowest energy from the 1  $\mu$ s MD simulations (B). SR-4133 and CK1 $\epsilon$  in the averaged structure are magenta and purple, and SR-4133 and CK1 $\epsilon$  in the structure with the lowest energy are yellow and gray, respectively.**

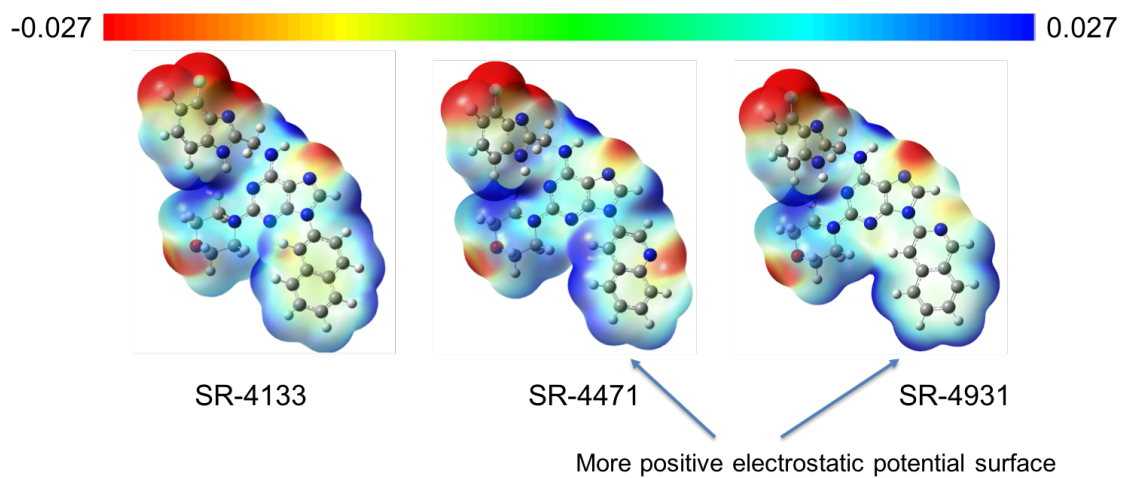

**Figure S9. Electrostatic potential surfaces of SR-4133, SR-4471, and SR-4931.** GaussView 6 was used to generate the electrostatic potential surfaces by using checkpoint files obtained from the geometry optimization of each ligand in B3LYP/6-311+G\*\*. SR-4471 and SR-4931 show more positive electrostatic potentials on the outer ring of quinoline/isoquinoline ring than SR-4133.



## Chemistry, General Experimental Details.

Commercially available reagents were used without further purification. Tetrahydrofuran and dichloromethane were purified by passing through a solvent column composed of activated A-1 alumina. Anhydrous acetone was purchased from Aldrich Chemical Company. Triethylamine and diisopropylethylamine were purified by distillation from calcium hydride. Unless indicated otherwise, all reactions were conducted under an atmosphere of argon using flame-dried or oven-dried (140 °C) glassware. The term “concentrated under reduced pressure” refers to the removal of solvents and other volatile materials using a rotary evaporator with the water bath temperature below 40 °C, followed by the removal of residual solvent at high vacuum (< 0.2 mbar). Proton nuclear magnetic resonance (<sup>1</sup>H NMR) spectra were recorded on a commercial instrument at 400 MHz. Carbon-13 nuclear magnetic resonance (<sup>13</sup>C NMR) spectra were recorded at 100 MHz and 175 MHz. The proton signal for residual non-deuterated solvent ( $\delta$  7.26 for CHCl<sub>3</sub>, 2.50 for dimethyl sulfoxide) was used as an internal reference for <sup>1</sup>H NMR spectra. For <sup>13</sup>C NMR spectra, chemical shifts are reported relative to the  $\delta$  77.1 resonance of CHCl<sub>3</sub> and  $\delta$  39.52 resonance of dimethyl sulfoxide. Coupling constants are reported in Hz. Infrared (IR) spectra were recorded as films on a commercial FTIR instrument. High-resolution mass spectra were recorded on a commercial high-resolution mass spectrometer. Analytical thin layer chromatography (TLC) was performed on Kieselgel 60 F254 glass plates precoated with a 0.25 mm thickness of silica gel. The TLC plates were visualized with UV light and/or by staining with KMnO<sub>4</sub>. Column chromatography was generally performed using Kieselgel 60 (230-400 mesh) silica gel, typically using a 50-100:1 weight ratio of silica gel to crude product. All compounds are >95% pure by HPLC analysis.

### General procedure A for Preparation of iodonium tetrafluoroborate

To a solution of the 1-naphthalene boronic acid (6.28 mmol) in CH<sub>2</sub>Cl<sub>2</sub> (100 ml) was added BF<sub>3</sub>•OEt<sub>2</sub> (6.93 mmol) at 0 °C. The reaction mixture was stirred for 10 min before the addition of a solution of 2-iodo-1,3,5-triisopropylbenzene diacetate (6.71 mmol) in CH<sub>2</sub>Cl<sub>2</sub> (20 ml) dropwise over 10 minutes. The reaction was allowed to warm to r.t. over the course of 2 h and then 100 ml saturated aq. NaBF<sub>4</sub> solution was added with rapid stirring and the stirring continued for 30 minutes. After this time the phases were separated, and the aqueous layer was extracted twice with CH<sub>2</sub>Cl<sub>2</sub>. The combined organics dried over NaSO<sub>4</sub> and passed through a short silica pad (30 g), eluted with CH<sub>2</sub>Cl<sub>2</sub> (300 mL) to remove byproduct, followed by CH<sub>2</sub>Cl<sub>2</sub>/MeOH (300 mL, 20:1), to elute the product. The iodonium tetrafluoroborate was precipitated from Et<sub>2</sub>O. The solid was filtered, washed with Et<sub>2</sub>O, and dried under a vacuum.

### 2-Naphthyl-(2,4,6-tri-isopropylphenyl)iodonium tetrafluoroborate (2)

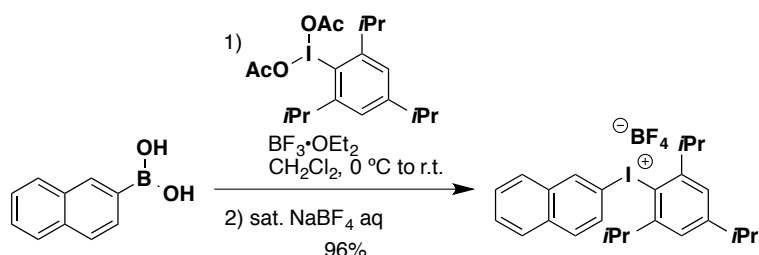

Synthesized according to general procedure A from 2-naphthlene boronic acid. *Iodonium tetrafluoroborate* was obtained as a brown solid (3.33 g, 96%). <sup>1</sup>H NMR (400 MHz, DMSO-*d*<sub>6</sub>, δ): 8.74 (d, *J* = 1.4 Hz, 1H), 8.07 (d, *J* = 4.4 Hz, 1H), 8.02 (m, 2H), 7.90 (dd, *J* = 9.2, 2.0 Hz, 1H), 7.69 (m, 2H), 7.31 (s, 2H), 3.52 (sept., *J* = 6.7 Hz, 2H), 2.96 (sept., *J* = 6.9 Hz, 1H), 1.25 (d, *J* = 6.8 Hz, 12H), 1.19 (d, *J* = 6.8 Hz, 6H); <sup>13</sup>C NMR (100 MHz, DMSO-*d*<sub>6</sub>, δ): 154.2, 151.2 (x2), 135.2, 133.9, 133.2, 131.6, 129.1, 128.9, 128.1 (x2), 128.0, 124.7 (x2), 123.4, 112.0, 38.7 (x2), 33.4, 24.1 (x4), 23.5 (x2).

### 1-Naphthyl-(2,4,6-tri-isopropylphenyl)iodonium tetrafluoroborate (2a)

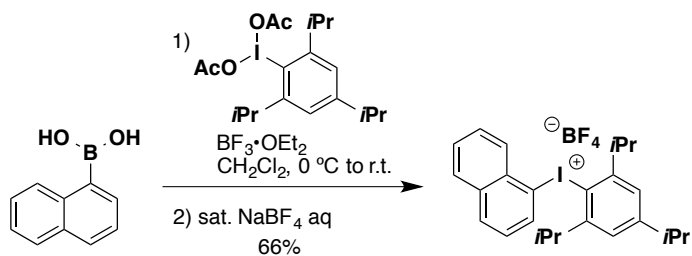

Synthesized according to general procedure A from 1-naphthlene boronic acid. *Iodonium tetrafluoroborate* was obtained as a brown solid (2.25 g, 66%). <sup>1</sup>H NMR (400 MHz, DMSO-*d*<sub>6</sub>, δ): 8.26 (d, *J* = 8.0 Hz, 2H),

8.23 (d,  $J = 8.4$  Hz, 1H), 8.08 (d,  $J = 7.6$  Hz, 1H), 7.88 (m, 1H), 7.75 (m, 1H), 7.59 (t,  $J = 7.8$  Hz, 1H), 7.26 (s, 2H), 3.50 (sept.,  $J = 6.7$  Hz, 2H), 3.02 (sept.,  $J = 6.9$  Hz, 1H), 1.17 (d,  $J = 6.8$  Hz, 6H), 1.14 (d,  $J = 6.4$  Hz, 12H).;  $^{13}\text{C}$  NMR (100 MHz, DMSO- $d_6$ ,  $\delta$ ): 154.0, 151.2 (x2), 136.3, 134.3, 133.2, 130.9, 129.5, 129.4, 128.6, 128.0, 127.8, 124.8 (x2), 124.3, 118.0, 39.4 (x2), 33.2, 24.1 (x4), 23.5 (x2). = 6.8 Hz, 6H), 1.14 (d,  $J = 6.4$  Hz, 12H).;  $^{13}\text{C}$  NMR (100 MHz, DMSO- $d_6$ ,  $\delta$ ): 154.0, 151.2 (x2), 136.3, 134.3, 133.2, 130.9, 129.5, 129.4, 128.6, 128.0, 127.8, 124.8 (x2), 124.3, 118.0, 39.4 (x2), 33.2, 24.1 (x4), 23.5 (x2).

### 3-((2,4,6-triisopropylphenyl)iodonio)quinolin-1-ium bistrifluoromethanesulfonate (2b)

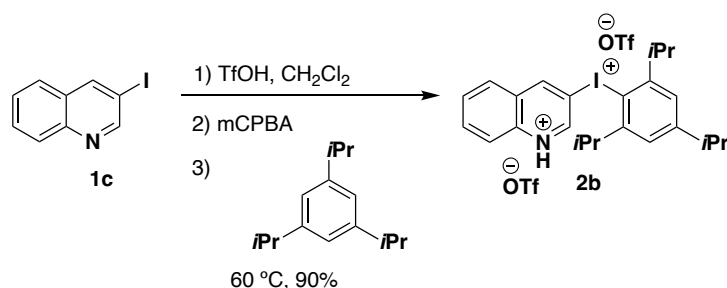

To a solution of 3-iodoquinoline (2.4 g, 9.5 mmol, 1 eq.) in  $\text{CH}_2\text{Cl}_2$  (50 mL, 0.2 M) was added triflic acid (3.4 mL, 38.5 mmol, 4 eq.). This mixture was stirred at RT for 5 minutes. Then, mCPBA (3.23 g, 14.1 mmol, 1.5 eq.) was added followed by triisopropylbenzene (2.6 mL, 10.8 mmol, 1.1 eq.). [Note: mCPBA *must* be added first.] This mixture was heated to 60 °C and stirred for 30 min. The cooled reaction mixture was concentrated under reduced pressure, triturated in  $\text{Et}_2\text{O}$ , and stirred at 0 °C for 2 hr. The resulting solid was collected by filtration, dried under a vacuum, and used without further purification. The product was isolated as a white solid, 6.52 g, 90% yield.  $^1\text{H}$  NMR (400 MHz, Methanol- $d_4$ )  $\delta$  9.19 – 9.11 (m, 2H), 8.18 – 7.96 (m, 3H), 7.83 (ddd,  $J = 8.2, 6.9, 1.2$  Hz, 1H), 7.36 (s, 2H), 3.62 – 3.45 (m, 2H), 3.01 (hept,  $J = 6.9$  Hz, 1H), 1.33 (d,  $J = 6.7$  Hz, 12H), 1.26 (d,  $J = 6.8, 6\text{H}$ ).  $J = 6.8, 6\text{H}$ ).

### 2,6-dichloro-9-(naphthalen-2-yl)-9H-purine (4)

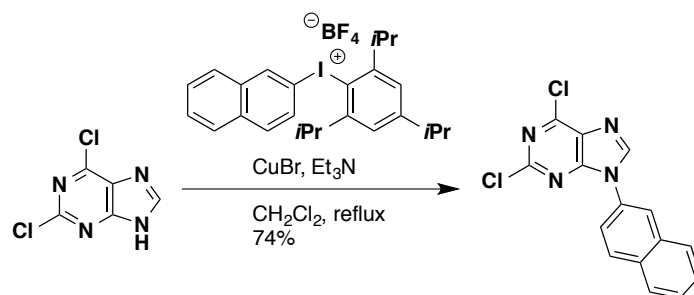

To a solution of 2,6-dichloropurine (507.7 mg, 2.69 mmol) in  $\text{CH}_2\text{Cl}_2$  (11 mL, 0.25 M) was added 2-Naphthyl-(2,4,6-tri-isopropylphenyl)iodonium tetrafluoroborate (2.22 g, 4.08 mmol), CuBr (47.2 mg, 0.329 mmol) and triethylamine (940  $\mu\text{L}$ , 6.74 mmol). The reaction mixture was stirred at reflux condition for 2.5 h. Then the reaction mixture was cooled to r.t. and concentrated *in vacuo*. The crude material was purified by flash chromatography (Hexane/EtOAc = 2/1 to 1/1) to give 624.8 mg (1.98 mmol, 74%) of the compound as a yellow powder.  $^1\text{H}$  NMR (400 MHz,  $\text{DMSO}-d_6$ ,  $\delta$ ): 9.22 (s, 1H), 8.39 (d,  $J = 2.0$  Hz, 1H), 8.21 (d,  $J = 8.8$  Hz, 1H), 8.07 (m, 2H), 7.95 (dd,  $J = 8.4, 2.2$  Hz, 1H), 7.66 (m, 2H).;  $^{13}\text{C}$  NMR (100 MHz,  $\text{DMSO}-d_6$ ,  $\delta$ ): 153.0, 151.6, 150.2, 147.6, 132.7, 132.3, 131.2, 131.0, 129.7, 128.1, 127.9, 127.4, 127.2, 122.3, 122.0 = 8.4, 2.2 Hz, 1H), 7.66 (m, 2H).;  $^{13}\text{C}$  NMR (100 MHz,  $\text{DMSO}-d_6$ ,  $\delta$ ): 153.0, 151.6, 150.2, 147.6, 132.7, 132.3, 131.2, 131.0, 129.7, 128.1, 127.9, 127.4, 127.2, 122.3, 122.0.

#### 2,6-dichloro-9-(naphthalen-1-yl)-9H-purine (4a)

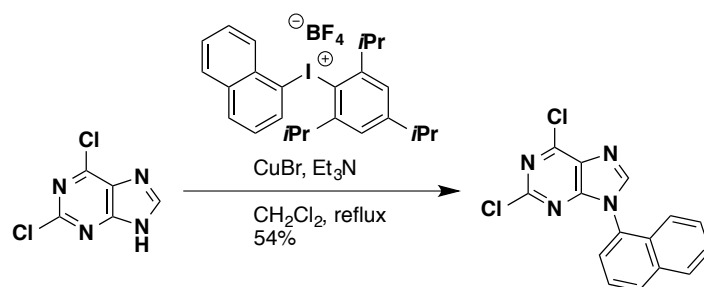

To a solution of 2,6-dichloropurine (505.4 mg, 2.67 mmol) in  $\text{CH}_2\text{Cl}_2$  (11 mL, 0.25 M) was added 1-Naphthyl-(2,4,6-tri-isopropylphenyl)iodonium tetrafluoroborate (2.14 g, 3.93 mmol), CuBr (45.5 mg, 0.317 mmol) and triethylamine (930  $\mu\text{L}$ , 6.67 mmol). The reaction mixture was stirred at reflux condition for 2.5 h. Then the reaction mixture was cooled to r.t. and concentrated *in vacuo*. The crude material was purified by flash chromatography (Hexane/EtOAc = 2/1) to give 452.1 mg (1.43 mmol, 54%) of title compound as a brown powder.  $^1\text{H}$  NMR (400 MHz,  $\text{DMSO}-d_6$ ,  $\delta$ ): 9.03 (s, 1H), 8.25 (d,  $J = 8.0$  Hz, 1H), 8.16 (d,  $J = 8.4$  Hz, 1H), 7.80 (dd,  $J = 7.2, 1.3$  Hz, 1H), 7.74 (app t,  $J = 7.8$  Hz, 1H), 7.67 (m, 1H), 7.56 (m, 1H), 7.45 (dd,

$J = 8.4, 0.8$  Hz, 1H);  $^{13}\text{C}$  NMR (100 MHz,  $\text{DMSO-}d_6$ ,  $\delta$ ): 154.7, 151.5, 150.2, 148.9, 133.7, 130.7, 130.6, 129.3, 129.0, 128.4, 127.9, 127.2, 126.2, 125.6, 122.3.

### 3-(2,6-dichloro-9H-purin-9-yl)quinoline (4b)

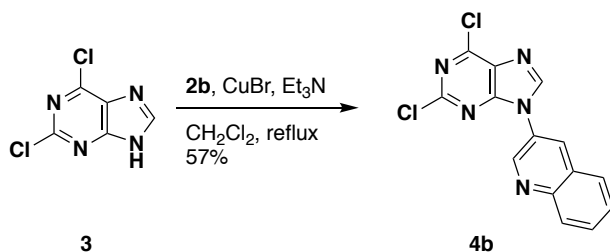

Synthesized by following the procedure for 4 or 4a, and the product was isolated as a white solid (500 mg, 57% yield).  $^1\text{H}$  NMR (400 MHz,  $\text{DMSO-}d_6$ ,  $\delta$ ): 9.33 (d,  $J = 2.5$  Hz, 1H), 9.28 (s, 1H), 8.86 (dd,  $J = 2.5, 0.8$  Hz, 1H), 8.17 (ddd,  $J = 8.1, 1.9, 1.0$  Hz, 2H), 7.91 (ddd,  $J = 8.4, 6.9, 1.5$  Hz, 1H), 7.77 (ddd,  $J = 8.2, 6.9, 1.2$  Hz, 1H).

### General procedure B – Chan-Lam Boronic Acid Coupling

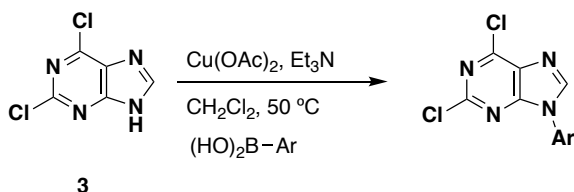

To a solution of 2,6-dichloropurine (3, 1 eq.) in CH<sub>2</sub>Cl<sub>2</sub> (0.25 M) was added arylboronic acid (2 eq.), triethylamine (3 eq.), and copper acetate (2 eq.). The reaction mixture was refluxed at 50 °C for 1 h, then cooled to 25 °C and filtered over celite washing 3 times with CH<sub>2</sub>Cl<sub>2</sub>. The filtrate was dry-loaded onto a silica column and purified by flash chromatography to give the coupled product.

### 2,6-dichloro-9-(3-fluorobenzyl)-9H-purine (5)

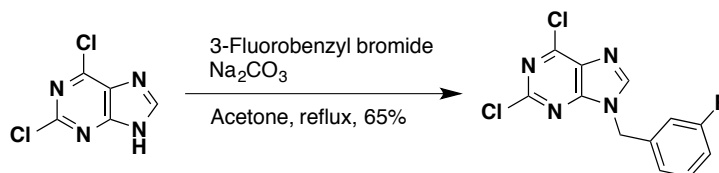

To a solution of 2,6-dichloropurine (1.0 g, 5.29 mmol) in acetone (22 mL, 0.24 M) was added sodium carbonate (1.16 g, 10.94 mmol). The reaction mixture was stirred at reflux condition for 20 minutes and was added 3-fluorobenzyl bromide (700  $\mu\text{L}$ , 5.71 mmol). Then the reaction mixture was stirred at reflux condition for 3 h. The reaction mixture was cooled to r.t. and passed through a Celite pad, washed with

EtOAc. The filtrate was concentrated *in vacuo*. The crude material was purified by flash chromatography (100/1: CH<sub>2</sub>Cl<sub>2</sub>/MeOH) to give 1.02 g (3.43 mmol, 65%) of title compound as a white powder. <sup>1</sup>H NMR (400 MHz, CDCl<sub>3</sub>, δ): 8.40 (s, 1H), 7.3 (m, 1H), 7.00 (m, 1H), 6.91 (m, 1H), 6.82 (m, 1H), 5.71 (s, 2H).; <sup>13</sup>C NMR (100 MHz, DMSO-*d*<sub>6</sub>, δ): 162.2 (d, *J* = 242.9 Hz), 153.4, 151.1, 149.8, 148.4, 138.3 (d, *J* = 7.2 Hz), 130.9 (d, *J* = 8.0 Hz) 130.6, 123.7 (d, *J* = 2.2 Hz), 115.0 (d, *J* = 21.1 Hz), 114.6 (d, *J* = 21.8 Hz), 46.5.

### 2,6-dichloro-9-(naphthalen-1-ylmethyl)-9H-purine (5a)

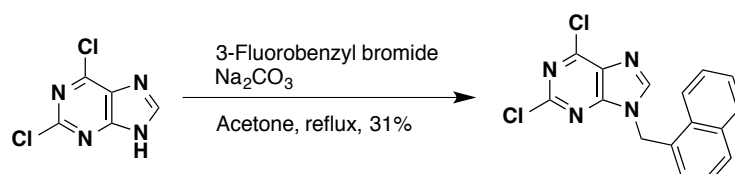

To a solution of 2,6-dichloropurine (861 mg, 4.56 mmol) in acetone (19 mL, 0.24 M) was added sodium carbonate (1.04 g, 9.81 mmol). The reaction mixture was stirred at reflux condition for 20 minutes and was added 1-(chloromethyl)-naphthalene (850 μL, 5.11 mmol). Then the reaction mixture was stirred at reflux condition for 17 h. The reaction mixture was cooled to r.t. and passed through a Celite pad, washed with EtOAc. The filtrate was concentrated *in vacuo*. The crude material was purified by flash chromatography (100/1: CH<sub>2</sub>Cl<sub>2</sub>/MeOH) to give 470.6 mg (1.43 mmol, 31%) of title compound as a white powder. <sup>1</sup>H NMR (400 MHz, CDCl<sub>3</sub>, δ): 7.93-7.87 (m, 3H), 7.86 (s, 1H), 7.56-7.42 (m, 4H), 5.82 (s, 2H).; <sup>13</sup>C NMR (100 MHz, DMSO-*d*<sub>6</sub>, δ): 153.6, 151.2, 149.9, 148.5, 133.3, 130.9, 130.6, 130.1, 128.7 (x2), 126.9, 126.3, 125.7, 125.6, 122.9, 45.1.

### 2,6-dichloro-9-(naphthalen-2-ylmethyl)-9H-purine (5b)

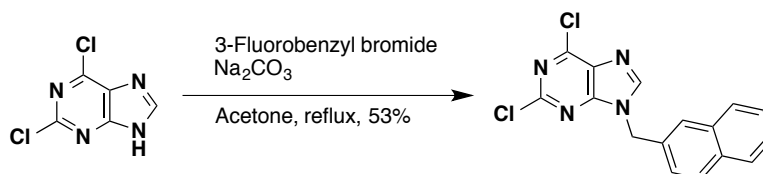

To a solution of 2,6-dichloropurine (1.09 g, 5.71 mmol) in acetone (24 mL, 0.24 M) was added sodium carbonate (1.20 g, 11.32 mmol). The reaction mixture was stirred at reflux condition for 20 minutes and was added 2-(bromomethyl)-naphthalene (1.39 g, 6.29 mmol). Then the reaction mixture was stirred at reflux condition for 2 h. The reaction mixture was cooled to r.t. and passed through a Celite pad, washed with EtOAc. The filtrate was concentrated *in vacuo*. The crude material was purified by flash chromatography (100/1: CH<sub>2</sub>Cl<sub>2</sub>/MeOH) to give 986.1 mg (3.00 mmol, 53%) of title compound as a white powder. <sup>1</sup>H NMR (400 MHz, CDCl<sub>3</sub>, δ): 8.09 (s, 1H), 7.86-7.79 (m, 3H), 7.76 (brs, 1H), 7.54-7.49 (m, 2H),

7.36 (dd,  $J = 8.4, 1.8$  Hz, 1H), 5.55 (s, 2H);  $^{13}\text{C}$  NMR (100 MHz,  $\text{DMSO-}d_6$ ,  $\delta$ ): 153.5, 151.1, 149.8, 148.5, 133.1, 132.8, 132.5, 130.6, 128.5, 127.8, 127.6, 126.5, 126.4, 126.3, 125.4, 47.7.

### 2,6-dichloro-9-(3-fluorophenethyl)-9H-purine (6)

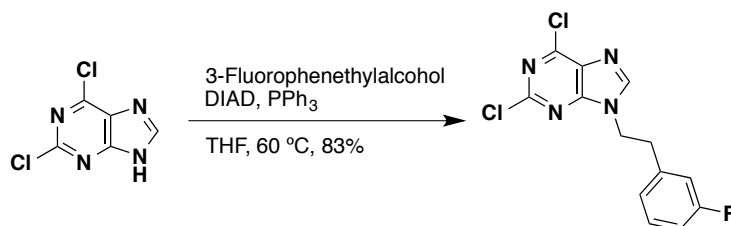

To a solution of 2,6-dichloropurine (497.9 mg, 2.63 mmol) in THF (26 mL, 0.1 M) was added 3-fluorophenylethylalcohol (650  $\mu\text{L}$ , 5.24 mmol),  $\text{PPh}_3$  (1.38 g, 5.26 mmol) and DIAD (1.0 mL, 5.16 mmol). The reaction mixture was stirred at 60 °C for 16 h. Then the reaction mixture was cooled to r.t. and concentrated *in vacuo*. The crude material was purified by flash chromatography (Hexane/EtOAc = 1/1) to give the product 673.8 mg (2.17 mmol, 83%) as a white powder.  $^1\text{H}$  NMR (400 MHz,  $\text{DMSO-}d_6$ ,  $\delta$ ): 8.54 (s, 1H), 7.29-7.23 (m, 1H), 7.08-6.99 (m, 2H), 6.92 (d,  $J = 7.6$  Hz, 1H), 4.53 (t,  $J = 7.0$  Hz, 1H), 3.18 (t,  $J = 7.0$  Hz, 1H);  $^{13}\text{C}$  NMR (100 MHz,  $\text{DMSO-}d_6$ ,  $\delta$ ): 162.2 (d,  $J = 241.4$  Hz), 153.4, 150.9, 149.5, 148.3, 140.3 (d,  $J = 7.3$  Hz), 130.3 (d,  $J = 4.4$  Hz), 130.2 (d,  $J = 4.4$  Hz), 124.9 (d,  $J = 2.9$  Hz), 115.6 (d,  $J = 21.1$  Hz), 113.5 (d,  $J = 21.0$  Hz), 44.9, 34.4. = 21.1 Hz), 113.5 (d,  $J = 21.0$  Hz), 44.9, 34.4.

### 2,6-dichloro-9-(3,5-difluorophenethyl)-9H-purine (6a)

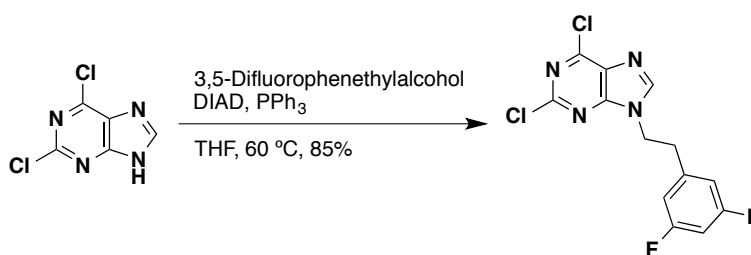

To a solution of 2,6-dichloropurine (505.2 mg, 2.67 mmol) in THF (28 mL, 0.1 M) was added 3,5-difluorophenethylalcohol (849.8 mg, 5.37 mmol),  $\text{PPh}_3$  (1.43 g, 5.68 mmol) and DIAD (1.1 mL, 5.68 mmol). The reaction mixture was stirred at 60 °C for 16 h. Then the reaction mixture was cooled to r.t. and concentrated *in vacuo*. The crude material was purified by flash chromatography (Hexane/EtOAc = 2/1) to give the product 750.9 mg (2.28 mmol, 85%) as a white powder.  $^1\text{H}$  NMR (400 MHz,  $\text{DMSO-}d_6$ ,  $\delta$ ): 8.54

(s, 1H), 7.06 (m, 1H), 6.93 (m, 2H), 4.54 (d,  $J = 6.8$  Hz, 2H), 3.18 (d,  $J = 6.8$  Hz, 2H);  $^{13}\text{C}$  NMR (100 MHz, DMSO- $d_6$ ,  $\delta$ ): 162.4 (d,  $J = 244.4$  Hz), 162.2 (d,  $J = 244.4$  Hz), 153.4, 150.9, 149.5, 148.3, 142.1 (t,  $J = 9.5$  Hz), 130.3, 112.1 (d,  $J = 24.7$  Hz, x2), 102.2 (t,  $J = 25.8$  Hz), 44.6, 34.3.

#### 2,6-dichloro-9-(3-methoxyphenethyl)-9H-purine (6b)

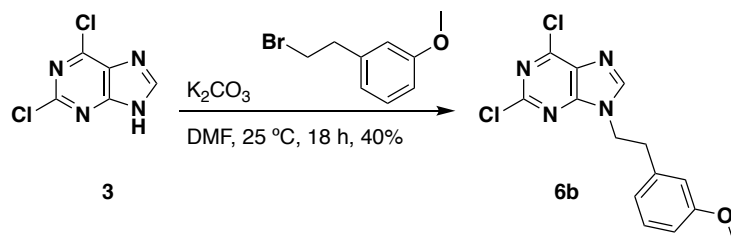

To a solution of **3** (790 mg, 4.2 mmol, 1 eq.) in DMF (17 mL, 0.25 M) was added potassium carbonate (880 mg, 6.3 mmol, 1.5 eq) and the alkyl bromide (680  $\mu\text{L}$ , 4.3 mmol, 1.05 eq). The mixture was stirred overnight at  $25^\circ\text{C}$  then subjected to column chromatography. Product isolated as a tan solid, 530 mg, 40% yield.  $^1\text{H}$  NMR (400 MHz,  $\text{CDCl}_3$ ,  $\delta$ ): 7.66 (s, 1H), 7.25 – 7.14 (m, 1H), 6.82 – 6.74 (m, 1H), 6.59 (dt,  $J = 6.9, 1.6$  Hz, 2H), 4.51 (t,  $J = 6.8$  Hz, 2H), 3.75 (s, 3H), 3.14 (t,  $J = 6.8$  Hz, 2H).

#### 9-(3-bromophenethyl)-2,6-dichloro-9H-purine (6c)

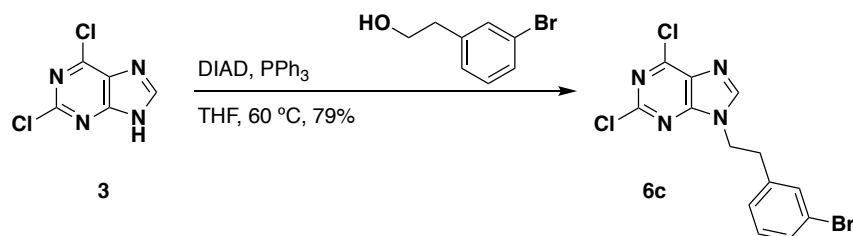

Synthesized by following the procedure for **6a**, and the product was isolated as a tan solid, 800 mg, 79% yield.  $^1\text{H}$  NMR (400 MHz,  $\text{CDCl}_3$ ,  $\delta$ ): 7.76 (s, 1H), 7.39 (ddd,  $J = 8.0, 2.0, 1.0$  Hz, 1H), 7.29 (t,  $J = 1.9$  Hz, 1H), 7.14 (t,  $J = 7.8$  Hz, 1H), 6.92 (ddd,  $J = 7.6, 1.7, 1.0$  Hz, 1H), 4.50 (t,  $J = 7.0$  Hz, 2H), 3.17 (t,  $J = 7.0$  Hz, 2H).

#### 4-(2-(2,6-dichloro-9H-purin-9-yl)ethyl)benzotrile (6d)



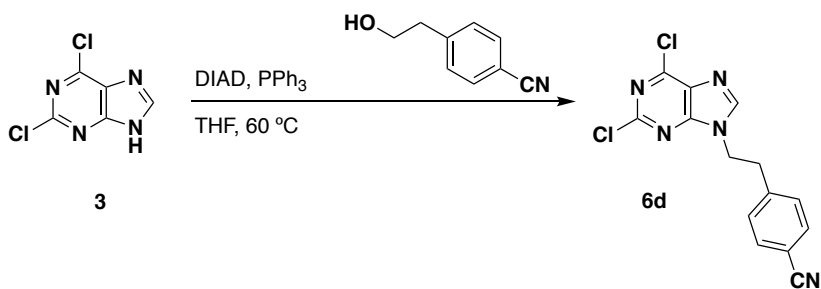

Synthesized by following the procedure for **6a**, and the product was isolated as a mixture with triphenylphosphine oxide in a 1:2 product:TPPO ratio. <sup>1</sup>H NMR (400 MHz, DMSO-*d*<sub>6</sub>, δ): 8.56 (s, 1H), 7.71 (d, *J* = 8.3 Hz, 2H), 7.66 – 7.51 (m, 32H - TPPO), 7.35 (d, *J* = 8.3 Hz, 2H), 4.55 (t, *J* = 6.9 Hz, 2H), 3.25 (t, *J* = 6.9 Hz, 2H).

#### 2,6-dichloro-9-(4-(trifluoromethyl)phenethyl)-9H-purine (**6e**)

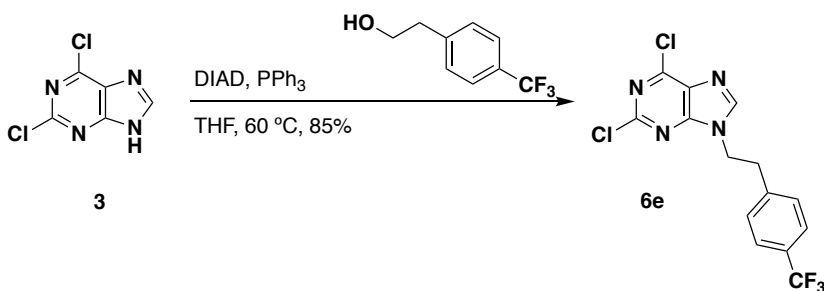

Synthesized by following the procedure for **6a**, and the product was isolated as a white solid, 810 mg, 85% yield. <sup>1</sup>H NMR (400 MHz, DMSO-*d*<sub>6</sub>, δ): 8.58 (s, 1H), 7.66 – 7.55 (m, 2H), 7.37 (d, *J* = 8.0 Hz, 2H), 4.55 (t, *J* = 7.0 Hz, 2H), 3.26 (t, *J* = 7.0 Hz, 2H).

#### 2,6-dichloro-9-(3-(trifluoromethyl)phenethyl)-9H-purine (**6f**)

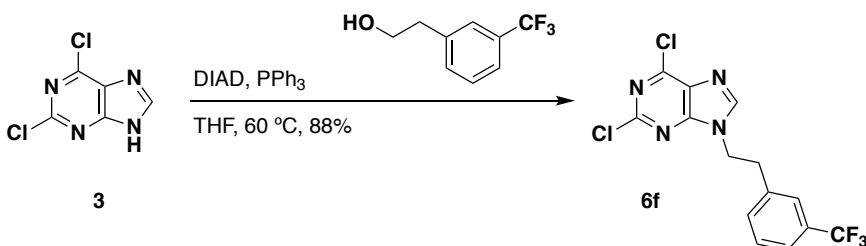

Synthesized by following the procedure for **6a**, and the product was isolated as a white solid, 630 mg, 88% yield. <sup>1</sup>H NMR (400 MHz, DMSO-*d*<sub>6</sub>, δ): 8.61 (s, 1H), 7.56 – 7.37 (m, 4H), 4.56 (t, *J* = 7.0 Hz, 2H), 3.26 (t, *J* = 7.0 Hz, 2H).

#### 2,6-dichloro-9-(3-chlorophenethyl)-9H-purine (**6g**)

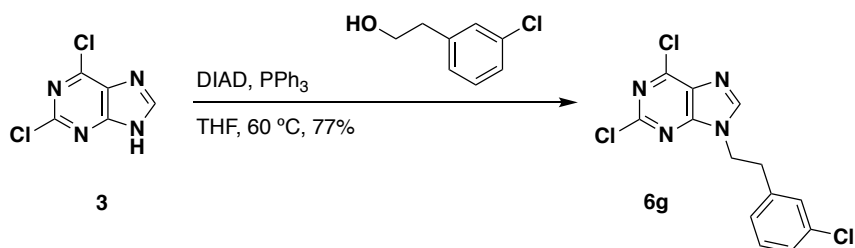

Synthesized by following the procedure for **6a**, and the product was isolated as a white solid, 705 mg, 77% yield. <sup>1</sup>H NMR (400 MHz, DMSO-*d*<sub>6</sub>, δ): 8.57 (s, 1H), 7.29 (dd, *J* = 1.9, 1.0 Hz, 1H), 7.26 – 7.22 (m, 2H), 7.06 (ddd, *J* = 4.9, 3.6, 1.6 Hz, 1H), 4.52 (t, *J* = 7.0 Hz, 2H), 3.16 (t, *J* = 7.0 Hz, 2H).

#### 2,6-dichloro-9-(4-fluorophenylethyl)-9H-purine (**6h**)

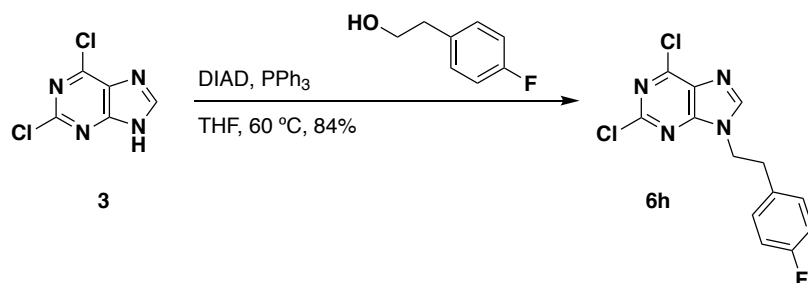

Synthesized by following the procedure for **6a**, and the product was isolated as a white solid, 700 mg, 84% yield. <sup>1</sup>H NMR (400 MHz, DMSO-*d*<sub>6</sub>, δ): 8.54 (s, 1H), 7.16 (ddt, *J* = 8.7, 5.3, 2.6 Hz, 2H), 7.11 – 7.00 (m, 2H), 4.49 (t, *J* = 7.0 Hz, 2H), 3.15 (t, *J* = 7.0 Hz, 2H).

#### 2,6-dichloro-9-(4-(methylthio)phenylethyl)-9H-purine (**6i**)

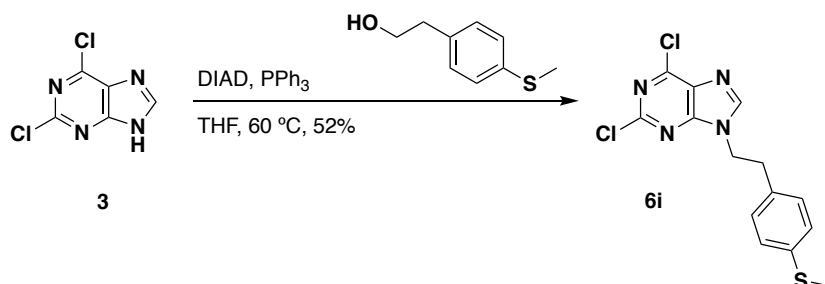

Synthesized by following the procedure for **6a**, and the product was isolated as a white solid, 350 mg, 52% yield. <sup>1</sup>H NMR (400 MHz, DMSO-*d*<sub>6</sub>, δ): 8.52 (s, 1H), 7.17 – 7.11 (m, 2H), 7.10 – 7.05 (m, 2H), 4.48 (t, *J* = 7.1 Hz, 2H), 3.12 (t, *J* = 7.1 Hz, 2H), 2.23 (s, 3H).

#### 2,6-dichloro-9-(2-(furan-3-yl)ethyl)-9H-purine (**6j**)

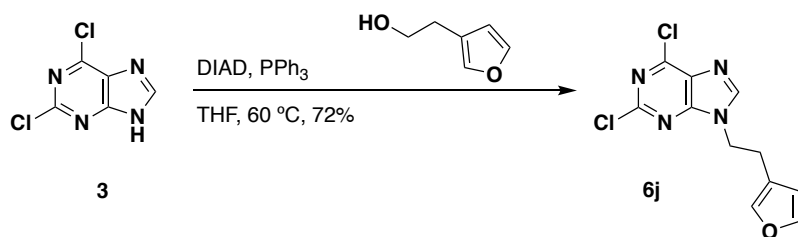

Synthesized by following the procedure for **6a**, and the product was isolated as a white solid, 390 mg, 72% yield.

<sup>1</sup>H NMR (400 MHz, DMSO-*d*<sub>6</sub>, δ): 8.59 (s, 1H), 7.56 (t, *J* = 1.7 Hz, 1H), 7.41 (dq, *J* = 1.8, 0.9 Hz, 1H), 6.37 (dd, *J* = 1.8, 0.9 Hz, 1H), 4.45 (t, *J* = 7.0 Hz, 2H), 3.03 – 2.95 (m, 2H).

#### 2,6-dichloro-9-(2-(thiophen-3-yl)ethyl)-9H-purine (**6k**)

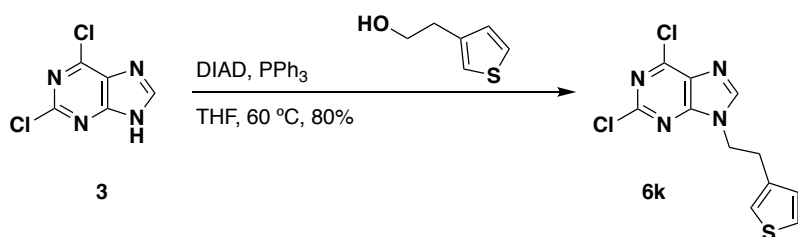

Synthesized by following the procedure for **6a**, and the product was isolated as a white solid, 655 mg, 80% yield., 655 mg, 80% yield.

<sup>1</sup>H NMR (400 MHz, DMSO-*d*<sub>6</sub>, δ): 8.53 (s, 1H), 7.45 (dd, *J* = 4.9, 2.9 Hz, 1H), 7.15 (dt, *J* = 2.9, 1.0 Hz, 1H), 6.97 (dd, *J* = 4.9, 1.3 Hz, 1H), 4.51 (t, *J* = 7.1 Hz, 2H), 3.22 – 3.14 (m, 2H).

#### 4-(2-(2,6-dichloro-9H-purin-9-yl)ethyl)phenol (**6l**)

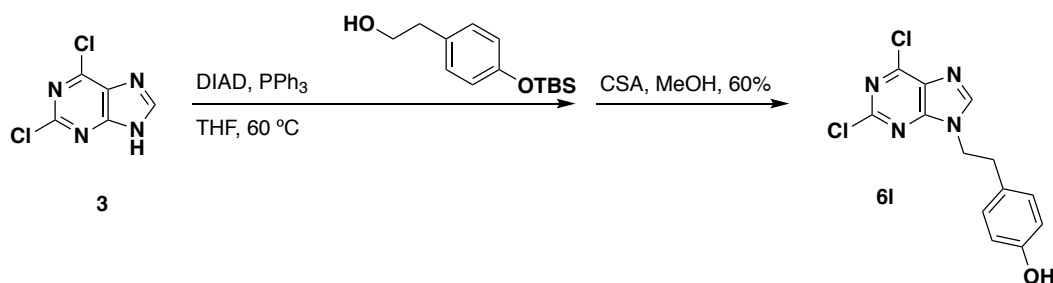

Synthesized by following the procedure for **6a**, and the product was isolated as a mixture with DIAD byproduct in a 1:1.5 product:DIAD ratio. To a solution of this mixture (1.34g of mixture, 2.3 mmol, 1 eq.) in methanol (12 mL, 0.2M) was added camphorsulfonic acid (722 mg, 3.1 mmol, 1.3 eq.). This solution was stirred at room temperature for 3 h then quenched with a saturated aqueous NaHCO<sub>3</sub> solution. This

mixture was extracted 2 times with CH<sub>2</sub>Cl<sub>2</sub>, and the combined organic layers were dried over Na<sub>2</sub>SO<sub>4</sub> and subjected to flash chromatography. Product isolated as a white solid, 500 mg, 60% yield over 2 steps. <sup>1</sup>H NMR (400 MHz, DMSO-*d*<sub>6</sub>, δ): 9.24 (s, 1H), 8.49 (s, 1H), 6.90 (d, *J* = 8.4 Hz, 2H), 6.62 (d, *J* = 8.4 Hz, 2H), 4.43 (t, *J* = 7.1 Hz, 2H), 3.02 (t, *J* = 7.1 Hz, 2H).

### 3-Fluorophenethylalcohol

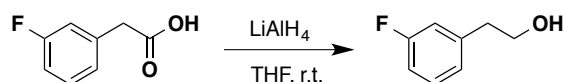

To a solution of LiAlH<sub>4</sub> (1.46 g, 38.47 mmol) in THF (40 mL) was added 3-fluorophenylacetic acid (2.31 g, 14.99 mmol) in THF (14 mL) at 0 °C. After stirring for 2 h at room temperature, the reaction was quenched with H<sub>2</sub>O (1.2 mL), 10% NaOH aq. (2.0 mL) and H<sub>2</sub>O (1.2 mL). The resulting solution was stirred for 1 h at r.t., and passed through Celite pad, washed with CH<sub>2</sub>Cl<sub>2</sub>. The filtrate was concentrated *in vacuo*. The crude product was used for subsequent reaction without purification. The analytical data was identified with the literature.<sup>3</sup>

### 3,5-Difluorophenethylalcohol

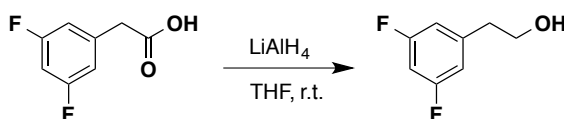

To a solution of LiAlH<sub>4</sub> (1.18 g, 31.09 mmol) in THF (30 mL) was added 3,5-difluorophenylacetic acid (2.05 g, 11.9 mmol) in THF (13 mL) at 0 °C. After stirring for 4 h at room temperature, the reaction was quenched with H<sub>2</sub>O (1.0 mL), 10% NaOH aq. (1.5 mL) and H<sub>2</sub>O (1.0 mL). The resulting solution was stirred for 1 h at r.t., and passed through Celite pad, washed with CH<sub>2</sub>Cl<sub>2</sub>. The filtrate was concentrated *in vacuo*. The crude product was used for subsequent reaction without purification. The analytical data was identified with the literature.<sup>4</sup>

### *N*-*N*-tert-butoxycarbonyl-2,3-difluoro-6-nitroaniline

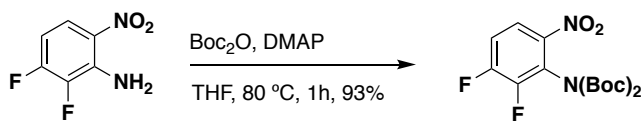

To a solution of 2,3-difluoro-6-nitroaniline (1000 mg, 5.7 mmol, 1 eq.) in THF (60 mL, 0.1 M) was added Boc anhydride (3760 mg, 17.2 mmol, 3 eq.), and DMAP (70 mg, 0.6 mmol, 0.1 eq.). This mixture was refluxed at 80°C for 1 hour until the consumption of **IV-23** was observed by LCMS. The mixture was dried under reduced pressure and subjected to flash chromatography (0% EtOAc in Hexanes to 10% EtOAc in Hexanes). Rf in 10% EtOAc in Hexanes = 0.5. Material isolated as a tan solid, 2000 mg, 93% yield. LCMS Method 2 time = 6.9 min.

#### *N,N*-tert-butoxycarbonyl-3,4-difluorobenzene-1,2-diamine

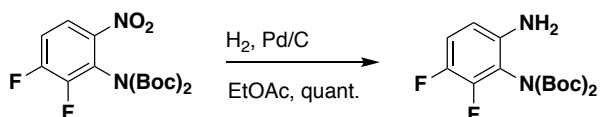

To a solution of *N,N*-tert-butoxycarbonyl-2,3-difluoro-6-nitroaniline (2000 mg, 5.3 mmol, 1 eq.) in ethyl acetate (30 mL, 0.2 M) was added palladium on carbon. The reaction was sealed in a pressure reactor and purged 3 times with argon. Subsequently, the vessel was purged 3 times with H<sub>2</sub> at 30 psi. The vessel was filled a final time with 30 psi of H<sub>2</sub> and stirred at this pressure overnight. The next day the vessel was purged 3 times with argon and opened. The mixture was filtered over celite, washing 3 times with ethyl acetate. The filtrate was dried down under reduced pressure and used without further purification. Material isolated as a tan solid, 1800 mg, quantitative yield. LCMS Method 1 time = 6.3 min. <sup>1</sup>H NMR (400 MHz, DMSO-*d*<sub>6</sub>) δ 7.07 (dt, J = 10.3, 9.0 Hz, 1H), 6.46 (ddd, J = 9.2, 4.8, 2.1 Hz, 1H), 5.21 (s, 2H), 1.36 (s, 18H); <sup>13</sup>C NMR (101 MHz, DMSO-*d*<sub>6</sub>) δ 149.93, 147.25, 147.12, 144.84, 144.71, 142.90, 142.88, 141.99, 141.87, 139.69, 139.57, 116.40, 116.22, 113.56, 113.43, 108.99, 108.96, 108.93, 108.89, 82.12, 27.40.

### General procedure C for the Preparation of the final compounds (yoshi comp)

A 2-5 mL Biotage microwave vial was charged with 2,6-dichloropurine analogues (1.0 mmol), 2-(methylamino)-4,5-difluorobenzimidazole • HCl (1.1 mmol), *N,N*-diisopropylethylamine (5.0 mmol), and isopropanol (2.5 mL). The vial was resealed and the reaction was heated to 90 °C for 30 minutes in the microwave unit. The cooled vial was then placed on a rotary evaporator and the reaction mixture was concentrated. Morpholine (2.5 mL) was added to the vial containing the concentrated crude mixture. The vial was resealed and the reaction was heated to 130 °C for 30 minutes in the microwave unit. The cooled reaction mixture was concentrated on a rotary evaporator and then the crude product was purified by flash chromatography on silica gel to give desired compound. Then, 0.1 M TFA aq. (1.0 mmol) was added to product (1.0 mmol) and sonicated for 30 min. Followed by freeze under -78 °C, dried using lyophilizer.

### General procedure D for Preparation of the final compounds (jamie comp)

A Biotage microwave vial was charged with N9 substituted 2,6-dichloropurine (1 eq.), 2-(methylamino)-4,5-difluorobenzimidazole • HCl (1.1 eq.), *N,N*-diisopropylethylamine (5 eq), and isopropanol (0.4 M). The vial was sealed and the reaction was heated at 90 °C for 30 minutes in the microwave unit. The cooled vial was then placed on a rotary evaporator and the reaction mixture was concentrated. Morpholine (0.4 M) was added to a microwave vial containing the concentrated crude mixture. The vial was sealed and the reaction was heated at 130 °C for 30 min in the microwave unit. The cooled reaction mixture was concentrated on a rotary evaporator and then the crude product was purified by flash chromatography or HPLC to give the final product.

### *N*-((4,5-difluoro-1H-benzo[d]imidazol-2-yl)methyl)-9-(3-fluorobenzyl)-2-morpholino-9Hpurin-6-amine trifluoroacetate salt (SR-3448)

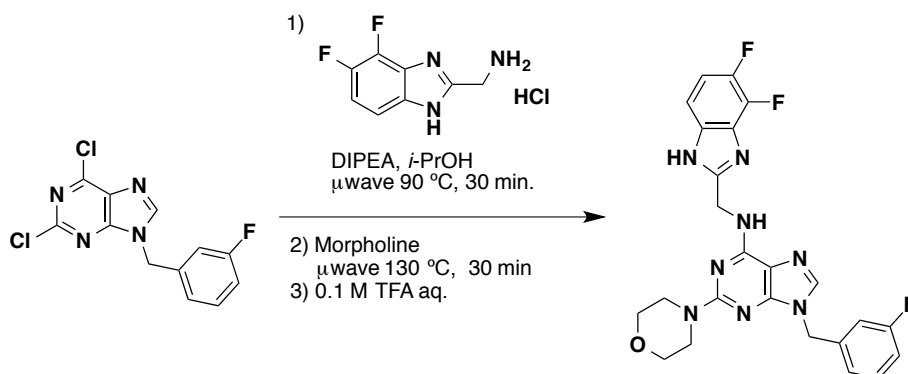

Synthesized according to general procedure C from 2,6-dichloro-9-(3-fluorobenzyl)-9*H*-purine in 49% yield as a white solid. <sup>1</sup>H NMR (400 MHz, DMSO-*d*<sub>6</sub>, δ): 8.37 (d, *J* = 9.2 Hz, 1H), 8.28 (brs, 1H), 8.20 (brs, 1H), 7.97 (m, 1H), 7.91 (d, *J* = 8.0 Hz, 1H), 7.57 (m, 2H), 7.49 (app t, *J* = 7.4 Hz, 1H), 7.38 (d, *J* = 6.8 Hz, 1H), 7.30-7.21 (m, 2H), 5.76 (s, 2H), 4.86 (brs, 2H), 3.51 (brs, 4H), 3.46 (brs, 4H).; <sup>13</sup>C NMR (175 MHz, DMSO-*d*<sub>6</sub>, δ): 162.1 (d, *J* = 242.2 Hz), 158.5, 158.4 (q, *J* = 36.9 Hz), 155.7, 153.0, 150.7, 146.1 (d, *J* = 8.8 Hz), 144.8 (d, *J* = 9.3 Hz), 139.3, 138.0, 133.1, 130.7 (d, *J* = 8.6 Hz), 128.1, 124.1 (d, *J* = 2.1 Hz), 115.9 (q, *J* = 288.7 Hz), 114.9 (d, *J* = 21.7 Hz), 114.7 (d, *J* = 21.0 Hz), 112.1 (d, *J* = 21.0 Hz), 110.4, 108.7, 65.8 (x2), 45.8, 44.5 (x2), 38.3.

***N*-((4,5-difluoro-1*H*-benzo[*d*]imidazol-2-yl)methyl)-2-morpholino-9-(naphthalen-1-ylmethyl)-9*H*purin-6-amine trifluoroacetate salt (SR-3449)**

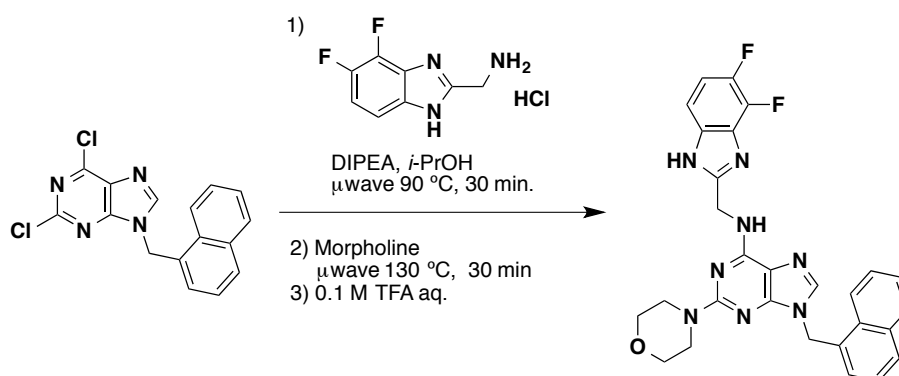

Synthesized according to general procedure C from 2,6-dichloro-9-(naphthalen-1-ylmethyl)-9*H*-purine in 57% yield as a white solid. <sup>1</sup>H NMR (400 MHz, DMSO-*d*<sub>6</sub>, δ): 8.30 (brs, 1H), 8.25 (s, 1H), 7.39 (m, 2H), 7.31-7.10 (m, 7H), 5.29 (s, 2H), 4.86 (s, 2H), 3.49 (brs, 4H), 3.46 (brs, 4H).; <sup>13</sup>C NMR (175 MHz, DMSO-*d*<sub>6</sub>, δ): 158.5, 158.4 (q, *J* = 36.9 Hz), 155.7, 153.8, 150.9, 146.1 (d, *J* = 9.5 Hz), 144.7 (d, *J* = 9.5 Hz), 139.5 (d, *J* = 15.3 Hz), 138.3, 138.0 (d, *J* = 15.2 Hz), 133.3, 132.1, 130.5, 128.6 (d, *J* = 4.2 Hz), 128.5, 126.7 (d, *J* = 5.1 Hz), 126.1, 125.5, 116.0 (q, *J* = 288.9 Hz), 111.9 (d, *J* = 20.8 Hz), 110.7, 108.6, 65.8 (x2), 44.5 (x2), 44.0, 38.3.

***N*-((4,5-difluoro-1*H*-benzo[*d*]imidazol-2-yl)methyl)-2-morpholino-9-(naphthalen-2-ylmethyl)-9*H*purin-6-amine trifluoroacetate salt (SR-3450)**

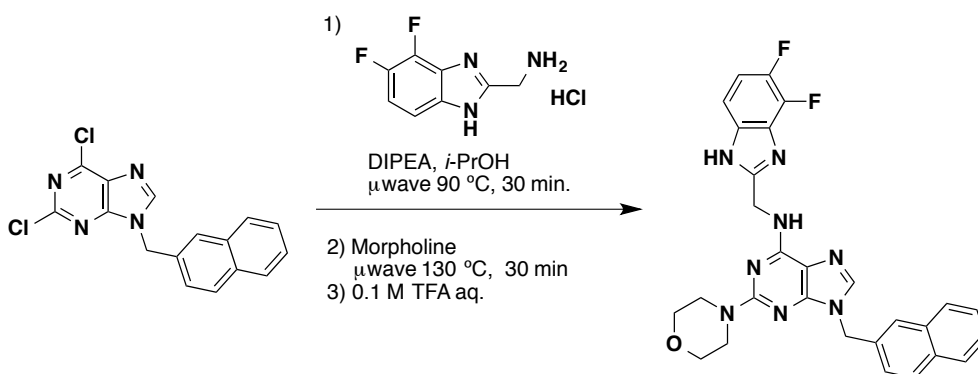

Synthesized according to general procedure C from 2,6-dichloro-9-(naphthalen-2-ylmethyl)-9H-purine in 58% yield as a white solid.  $^1\text{H}$  NMR (400 MHz, DMSO- $d_6$ ,  $\delta$ ): 8.23 (brs, 2H), 7.90-7.85 (m, 4H), 7.53-7.48 (m, 3H), 7.27-7.18 (m, 2H), 5.43 (s, 2H), 4.84 (s, 2H), 3.52 (brs, 4H), 3.46 (brs, 4H);  $^{13}\text{C}$  NMR (175 MHz, DMSO- $d_6$ ,  $\delta$ ): 158.5, 158.4 (q,  $J = 36.9$  Hz), 155.7, 153.2, 150.9, 145.9 (d,  $J = 9.5$  Hz), 144.6 (d,  $J = 9.5$  Hz), 139.6 (d,  $J = 13.7$  Hz), 138.2, 134.2, 133.5, 132.7, 132.4, 128.3, 127.7, 127.6, 126.8, 126.5, 126.3, 126.0, 115.7 (q,  $J = 289.6$  Hz), 111.5 (d,  $J = 20.8$  Hz), 111.1, 108.4, 65.8 (x2), 46.5, 44.5 (x2), 38.4.

***N*-((4,5-difluoro-1H-benzo[d]imidazol-2-yl)methyl)-9-(3-fluorophenethyl)-2-morpholino-9H-purin-6-amine trifluoroacetate salt (SR-3451)**

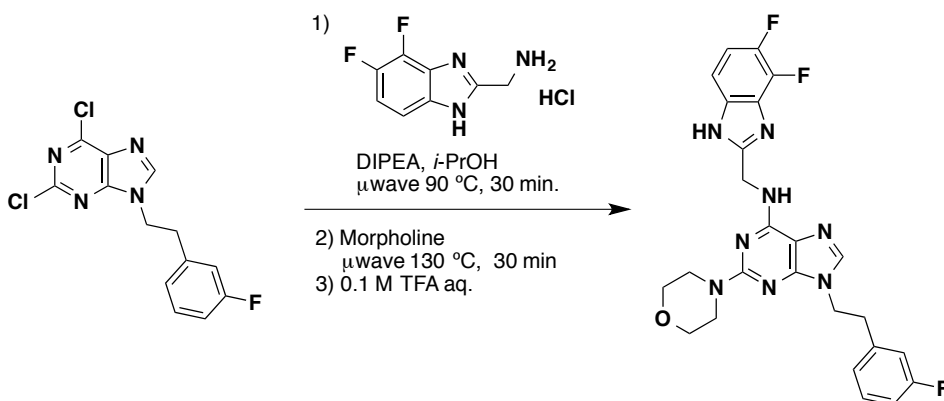

Synthesized according to general procedure C from 2,6-dichloro-9-(3-fluorophenethyl)-9H-purine in 72% yield as a white solid.  $^1\text{H}$  NMR (400 MHz, DMSO- $d_6$ ,  $\delta$ ): 8.26 (brs, 1H), 8.07 (s, 1H), 7.32-7.21 (m, 3H), 7.08-7.00 (m, 2H), 6.96 (d,  $J = 7.6$  Hz, 1H), 4.86 (s, 2H), 4.35 (t,  $J = 7.0$  Hz, 2H), 3.52 (s, 4H), 3.50 (s, 4H), 3.15 (t,  $J = 7.0$  Hz, 2H);  $^{13}\text{C}$  NMR (175 MHz, DMSO- $d_6$ ,  $\delta$ ): 162.6 (d,  $J = 241.3$  Hz), 158.9, 158.8 (q,  $J = 36.4$  Hz), 156.0, 153.0, 151.1, 146.4 (d,  $J = 9.5$  Hz), 145.1 (d,  $J = 9.3$  Hz), 141.2 (d,  $J = 7.2$  Hz), 140.0 (d,  $J = 15.2$  Hz), 138.6 (d,  $J = 13.7$  Hz), 138.4, 134.0, 130.7 (d,  $J = 8.6$  Hz), 129.3, 125.3, 116.0 (q,  $J = 289.4$  Hz), 115.9 (d,  $J = 20.8$  Hz), 113.8 (d,  $J = 20.3$  Hz), 112.1 (d,  $J = 20.1$  Hz), 110.0, 109.0, 66.3



(x2), 44.9 (x2), 44.6, 38.8, 34.8.; HRMS (ESI-TOF) calculated for C<sub>25</sub>H<sub>24</sub>N<sub>8</sub>O<sub>3</sub> (M+H)<sup>+</sup> 509.2025, found 509.2022.

***N*-((4,5-difluoro-1H-benzo[d]imidazol-2-yl)methyl)-2-morpholino-9-(naphthalen-1-yl)-9H-purin-6-amine (SR-4132)**

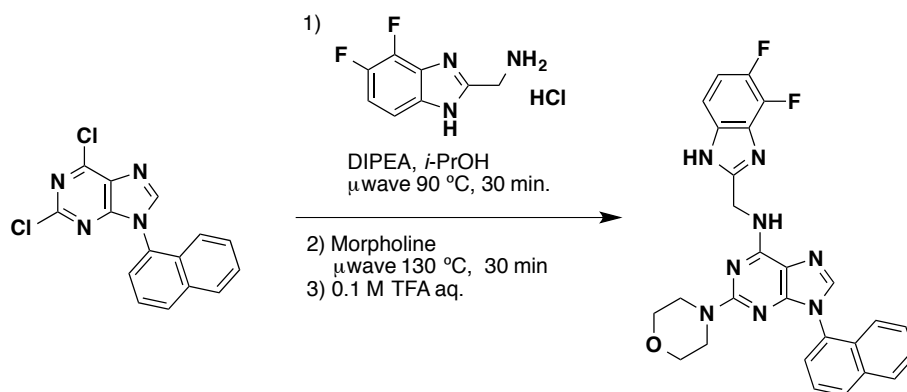

Synthesized according to general procedure C from 2,6-dichloro-9-(naphthalen-1-yl)-9H-purine in 53% yield as a white solid. <sup>1</sup>H NMR (400 MHz, DMSO-*d*<sub>6</sub>, δ): 8.37 (brs, 1H), 8.13 (s, 1H), 8.11 (dd, *J* = 14.0, 8.2 Hz), 7.69 (app t, *J* = 7.6 Hz), 7.64-7.60 (m, 2H), 7.57- 7.53 m, 1H), 7.39 (d, *J* = 8.4 Hz), 7.31-7.20 (m, 2H), 4.89 (s, 2H), 3.34 (s, 4H), 3.29 (s, 4H); <sup>13</sup>C NMR (175 MHz, DMSO-*d*<sub>6</sub>, δ): 158.6, 158.3, (q, *J* = 36.4 Hz), 156.1, 154.1, 152.5, 146.0 (d, *J* = 9.5 Hz), 144.6 (q, *J* = 9.3 Hz), 139.6 (d, *J* = 15.2 Hz), 139.2, 138.2 (d, *J* = 15.2 Hz), 133.8, 133.5, 131.2, 129.3 (d, *J* = 7.4 Hz), 128.3, 127.2, 126.8, 125.7, 125.4, 122.7, 115.7 (q, *J* = 289.6 Hz), 112.9, 111.5 (d, *J* = 20.8 Hz), 108.4, 65.7 (x2), 44.3 (x2).

***N*-((4,5-difluoro-1H-benzo[d]imidazol-2-yl)methyl)-2-morpholino-9-(naphthalen-2-yl)-9H-purin-6-amine (SR-4133)**

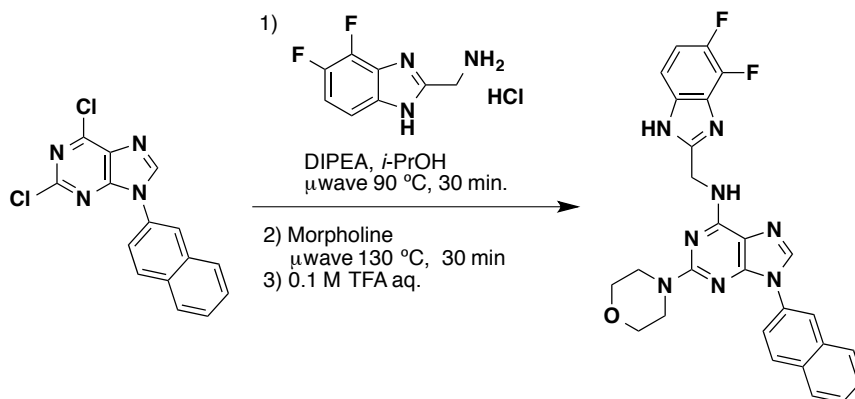

Synthesized according to general procedure C from 2,6-dichloro-9-(naphthalen-2-yl)-9H-purine in 74% yield as a white solid. <sup>1</sup>H NMR (400 MHz, DMSO-*d*<sub>6</sub>, δ): 8.48 (s, 1H), 8.46 (s, 1H), 8.33 (brs, 1H), 8.13-8.06 (m, 2H), 8.00-7.99 (m, 2H), 7.62-7.55 (m, 2H), 7.29-7.19 (m, 2H), 4.87 (s, 2H), 3.52 (s, 4H), 3.49 (s, 4H); <sup>13</sup>C NMR (175 MHz, DMSO-*d*<sub>6</sub>, δ): 158.6, 158.3 (q, *J* = 35.2 Hz), 156.0, 154.1, 150.9, 146.0 (d, *J* = 9.5 Hz), 144.6 (d, *J* = 9.3 Hz), 139.5 (d, *J* = 14.4 Hz), 138.1 (d, *J* = 14.4 Hz), 137.2, 133.4, 133.1, 133.0, 131.4, 129.2, 127.9, 127.7, 127.0, 126.4, 121.1, 119.8, 115.6 (q, *J* = 289.4 Hz), 113.9, 111.7 (d, *J* = 21.0 Hz), 108.4, 65.9, 44.5; HRMS (ESI-TOF) calculated for C<sub>27</sub>H<sub>23</sub>N<sub>8</sub>O<sub>2</sub> (M+H)<sup>+</sup> 513.1963, found 513.1971.

**N-((6,7-difluoro-1H-benzo[d]imidazol-2-yl)methyl)-2-morpholino-9-(quinolin-3-yl)-9H-purin-6-amine (SR-4471)**

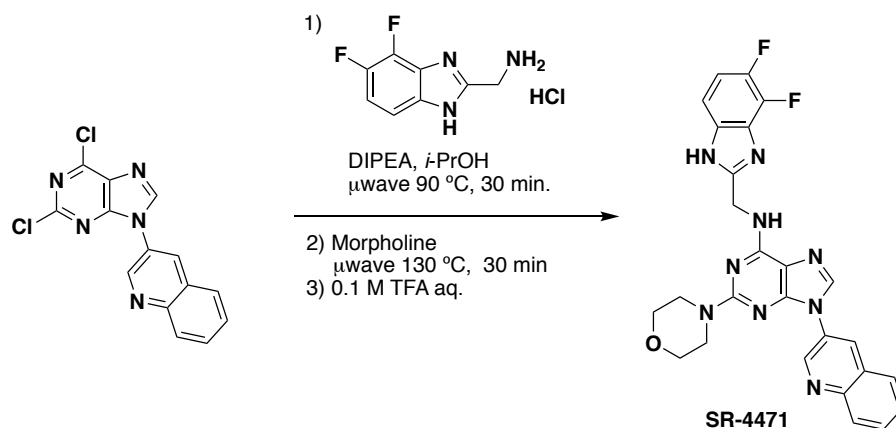

Synthesized according to general procedure C from 3-(2,6-dichloro-9H-purin-9-yl)quinoline (white solid, 120 mg, 67% yield). <sup>1</sup>H NMR (400 MHz, DMSO-*d*<sub>6</sub>, δ): 9.49 (d, *J* = 2.5 Hz, 1H), 8.87 (d, *J* = 2.5 Hz, 1H), 8.54 (s, 1H), 8.40 (s, 1H), 8.09 (td, *J* = 7.4, 6.6, 1.2 Hz, 2H), 7.83 (ddd, *J* = 8.4, 6.9, 1.5 Hz, 1H), 7.71 (ddd, *J* = 8.1, 6.8, 1.2 Hz, 1H), 7.32 – 7.17 (m, 2H), 4.88 (s, 2H), 3.50 (d, *J* = 16.9 Hz, 8H); <sup>13</sup>C NMR (151 MHz, DMSO-*d*<sub>6</sub>, δ): 159.25, 159.14, 159.01, 158.77, 156.43, 154.65, 151.33, 146.53 (d, *J* = 9.5 Hz), 146.10, 145.73, 139.36 (d, *J* = 251.3 Hz), 137.25, 133.89, 130.32, 129.13, 128.75, 128.17, 127.89, 117.19, 115.26, 114.27, 112.07 (d, *J* = 20.3 Hz), 108.83, 66.32, 44.92, 38.81; HRMS (ESI-TOF) calculated for C<sub>26</sub>H<sub>22</sub>N<sub>9</sub>O<sub>2</sub> (M+H)<sup>+</sup> 514.1915, found 514.1898.

**N-((6,7-difluoro-1H-benzo[d]imidazol-2-yl)methyl)-9-(4-isopropoxyphenyl)-2-morpholino-9H-purin-6-amine (SR-19840)**

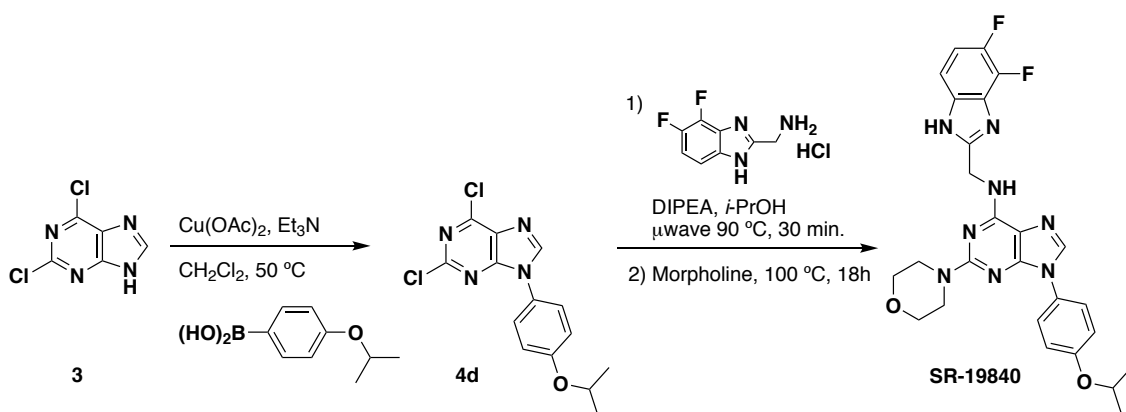

Synthesized according to the general procedure B followed by the general procedure D ( $100\text{ }^\circ\text{C}$ , oil bath heating, for 18 h in step 2). Product isolated as a white solid (63 mg, 77% yield from **4d**, 11% yield from **3** to **4d**).  $^1\text{H}$  NMR (400 MHz,  $\text{DMSO-}d_6$ ,  $\delta$ ): 8.28 (d,  $J = 14.3$  Hz, 2H), 7.76 – 7.64 (m, 2H), 7.34 – 7.15 (m, 2H), 7.12 – 7.00 (m, 2H), 4.90 (s, 2H), 4.66 (hept,  $J = 6.0$  Hz, 1H), 3.47 (s, 8H), 1.28 (d,  $J = 6.0$  Hz, 6H);  $^{13}\text{C}$  NMR (151 MHz,  $\text{DMSO-}d_6$ ,  $\delta$ ): 158.55, 156.27, 156.00, 154.06, 150.68, 145.18 (dd,  $J = 234.8, 9.3$  Hz), 139.00 (dd,  $J = 250.4, 14.9$  Hz), 137.19, 133.74, 129.47, 128.15, 123.98, 116.12, 113.54, 111.28 (d,  $J = 21.2$  Hz), 108.19, 69.54, 65.87, 44.48, 38.41, 21.77; HRMS (ESI-TOF) calculated for  $\text{C}_{26}\text{H}_{27}\text{N}_8\text{O}_2\text{F}_2$  ( $\text{M}+\text{H}$ ) $^+$  521.2225, found 521.2206.

**N-((6,7-difluoro-1H-benzo[d]imidazol-2-yl)methyl)-9-(2,3-dihydrobenzo[b][1,4]dioxin-6-yl)-2-morpholino-9H-purin-6-amine (SR-19841)**

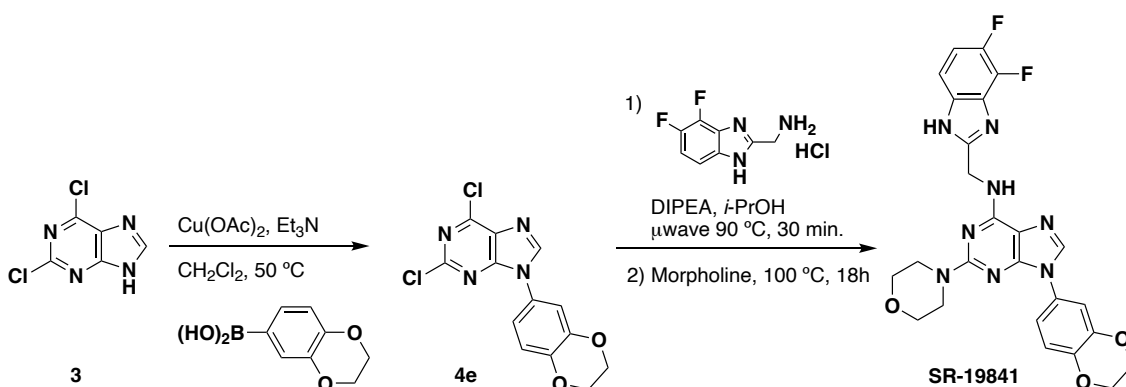

Synthesized according to the general procedure B followed by the general procedure D ( $100\text{ }^\circ\text{C}$ , oil bath heating, for 18 h in step 2).  $^1\text{H}$  NMR (400 MHz,  $\text{DMSO-}d_6$ ,  $\delta$ ): 8.29 (s, 2H), 7.42 (d,  $J = 2.6$  Hz, 1H), 7.36 – 7.21 (m, 3H), 7.01 (d,  $J = 8.7$  Hz, 1H), 4.89 (s, 2H), 4.29 (s, 4H), 3.46 (s, 8H);  $^{13}\text{C}$  NMR (151 MHz,  $\text{DMSO-}d_6$ ,  $\delta$ ): 170.04, 158.98, 156.47, 154.49, 151.05, 150.19, 146.83 – 144.78 (m), 144.01, 143.78, 143.14, 142.78, 137.61, 133.63, 131.01, 130.11, 129.35, 127.75, 127.26, 124.31, 123.40, 117.98, 115.69, 114.08,

111.84, 108.77, 66.32, 64.70, 64.55, 44.95, 38.84; HRMS (ESI-TOF) calculated for  $C_{25}H_{23}N_8O_3F_2$  (M+H)<sup>+</sup> 521.1861, found 521.1852.

***N*-((4,5-difluoro-1H-benzo[d]imidazol-2-yl)methyl)-9-(3,5-difluorophenethyl)-2-morpholino-9H-purin-6-amine (SR-4290)**

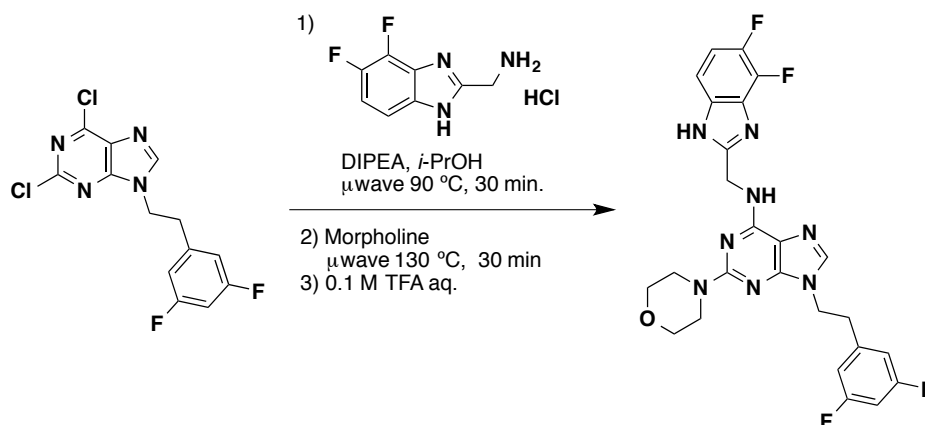

Synthesized according to general procedure C from 2,6-dichloro-9-(3,5-difluorophenethyl)-9H-purine in 74% yield as a white solid. <sup>1</sup>H NMR (400 MHz, DMSO-*d*<sub>6</sub>, δ): 8.15 (brs, 1H), 7.91 (s, 1H), 7.28-7.18 (m, 2H), 7.08-7.03 (m, 1H), 6.95-6.91 (m, 1H), 4.83 (s, 2H), 4.33 (t, *J* = 7.0 Hz), 3.51 (brs, 8H), 3.15 (t, *J* = 7.0 Hz); <sup>13</sup>C NMR (100 MHz, DMSO-*d*<sub>6</sub>, δ): 162.3 (d, *J* = 244.3 Hz), 162.2 (t, *J* = 244.3 Hz), 158.5 (q, *J* = 35.4 Hz), 158.4, 155.7, 153.0, 150.8, 145.9 (d, *J* = 9.5 Hz), 144.5 (d, *J* = 9.5 Hz), 142.6 (t, *J* = 9.0 Hz), 139.7 (d, *J* = 15.2 Hz), 138.3 (d, *J* = 15.2 Hz), 138.1, 133.8, 129.4, 115.9 (d, *J* = 290.4 Hz), 112.0 (d, *J* = 4.4 Hz), 111.9 (d, *J* = 4.4 Hz), 110.8, 108.3, 102.0 (t, *J* = 25.3 Hz), 65.9 (x2), 44.5 (x2), 43.5, 38.4.

***N*-((6,7-difluoro-1H-benzo[d]imidazol-2-yl)methyl)-9-(4-methoxyphenyl)-2-morpholino-9H-purin-6-amine (SR-4310)**

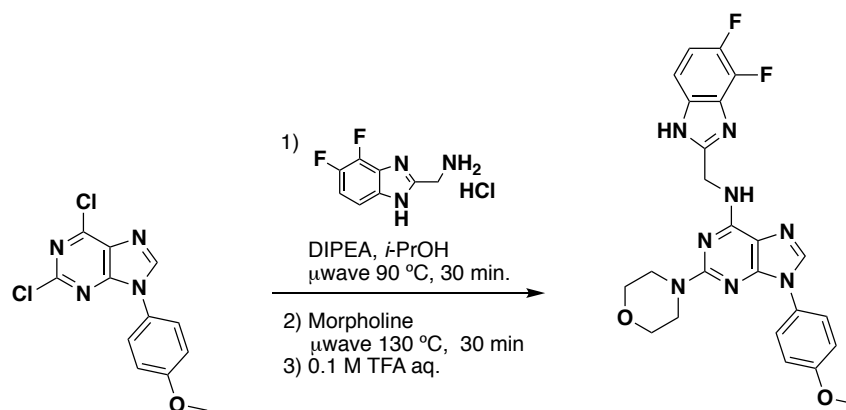

Synthesized according to general procedure C from 2,6-dichloro-9-(4-methoxyphenyl)-9H-purine in 72% yield as a white solid.  $^1\text{H NMR}$  (400 MHz,  $\text{DMSO-}d_6$ ,  $\delta$ ): 8.28 (s, 1H), 7.84 – 7.65 (m, 2H), 7.35 – 7.17 (m, 2H), 7.13 – 7.05 (m, 2H), 4.87 (s, 2H), 3.81 (s, 3H), 3.46 (m, 8H). HRMS (ESI-TOF) calculated for  $\text{C}_{24}\text{H}_{23}\text{N}_8\text{O}_2\text{F}_2$  ( $\text{M}+\text{H}$ ) $^+$  493.1912, found 493.193.

#### 2,6-dichloro-9-(tetrahydro-2H-pyran-2-yl)-9H-purine (7)

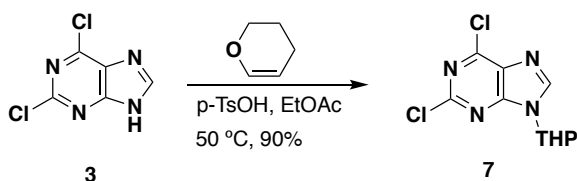

To a solution of 2,6-dichloropurine (5000 mg, 26.5 mmol, 1 eq.) was added *p*-TsOH monohydrate (50 mg, 1 mmol, 0.01 eq.). This mixture was heated to 50 °C and 3,4-dihydro-2H-pyran was added at this temperature. After stirring 30 min at 50 °C, the mixture is cooled to 25 °C, dried down under reduced pressure, and subjected to flash chromatography (0% EtOAc in Hexanes to 10% EtOAc in Hexanes). Material isolated as a tan solid, 7000 mg, 50% yield.  $^1\text{H NMR}$  (400 MHz,  $\text{DMSO-}d_6$ ,  $\delta$ ): 8.94 (s, 1H), 5.74 (dd,  $J = 10.8, 2.3$  Hz, 1H), 4.02 (m, 1H), 3.82 – 3.69 (m, 1H), 2.26 (m, 1H), 2.06 – 1.93 (m, 2H), 1.77 (m, 1H), 1.60 (m, 2H);  $^{13}\text{C NMR}$  (101 MHz,  $\text{DMSO-}d_6$ ,  $\delta$ ): 152.68, 151.23, 149.93, 146.35, 130.54, 81.66, 67.76, 29.71, 24.38, 22.03.

#### Ethyl N-(tert-butoxycarbonyl)-N-(2-morpholino-9H-purin-6-yl)glycinate (9)

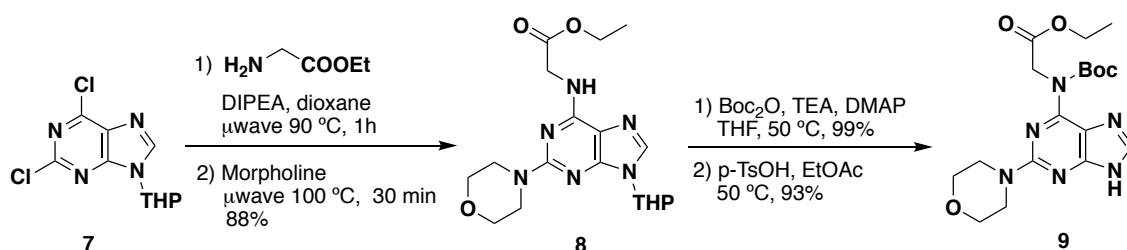

The compound (**8**, white solid) was prepared using the General method D with glycine ethyl ester. To a solution of **8** (1200 mg, 3.1 mmol, 1 eq.) in THF (15 mL, 0.2 M) was added Boc anhydride (1350 mg, 6.1 mmol, 2 eq.), triethylamine (470  $\mu$ L, 3.4 mmol, 1.1 eq.) and DMAP (38 mg, 0.3 mmol, 0.1 eq.). This mixture is heated to 50 °C overnight. The cooled reaction mixture was concentrated under reduced pressure and subjected to flash chromatography to produce Boc-protected **8** as an off-white solid (1500 mg, 99% yield). To a solution of Boc-protected **8** (1400 mg, 2.9 mmol, 1 eq.) in ethanol (30 mL, 0.1 M) was added *p*-TsOH (600 mg, 3.1 mmol, 1.1 eq.). This mixture was heated to 50 °C until the consumption of the reactant was observed by LCMS. A small amount of product without the Boc protecting group is also observed during the reaction conditions. The cooled reaction mixture was concentrated under reduced pressure and subjected to flash chromatography (0% MeOH in CH<sub>2</sub>Cl<sub>2</sub> to 10% MeOH in CH<sub>2</sub>Cl<sub>2</sub>). Material isolated as a tan solid, 1100 mg, 93% yield. <sup>1</sup>H NMR (400 MHz, DMSO-*d*<sub>6</sub>,  $\delta$ ): 8.19 (s, 1H), 4.52 (s, 2H), 4.13 (q, *J* = 7.2 Hz, 2H), 3.70 – 3.54 (m, 11H), 1.43 (s, 9H), 1.18 (t, *J* = 7.1 Hz, 3H); <sup>13</sup>C NMR (101 MHz, DMSO-*d*<sub>6</sub>,  $\delta$ ): 169.64, 158.30, 158.06, 153.11, 150.03, 141.95, 128.53, 125.98, 115.48, 82.49, 66.46, 66.40, 61.04, 60.71, 48.69, 45.14, 45.05, 27.96, 14.53.

### General procedure E for the Preparation of SR-4931, SR-4932, and SR-4933

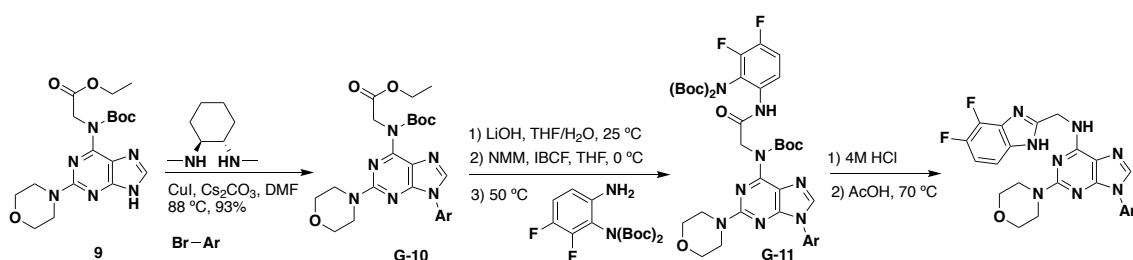

**Aryl bromide coupling.** A Biotage microwave vial containing a solution of the substituted purine **9** (1 eq.), aryl bromide (2 eq.), and cesium carbonate (3 eq.) in DMF (0.1 M) was degassed by bubbling argon through the mixture for 30 min. The *trans*-*N,N'*-dimethylcyclohexane-1,2-diamine and copper iodide were subsequently added and degassed another 5 min. The vial was sealed and heated overnight at 88 °C in an oil bath. The next day water was added to the cooled mixture which was subsequently extracted 3 times with ethyl acetate. After washing with brine, the combined organic layers were dried over sodium sulfate and purified using flash chromatography to give the N9 substituted compound **G-10**.

**Saponification of Glycine Ethyl Ester Substituted Purines.** To a solution of **G-10** (1 eq.) in THF (0.2 M) was added a 2.2 M solution of LiOH in water (4 eq.). This mixture was stirred at 25 °C until the consumption of starting material was observed by LCMS. After this point, 1 M HCl was added, and the product was extracted 3 times with ethyl acetate. After washing with slightly acidic brine, the combined organic layers were dried over sodium sulfate. After drying under reduced pressure, the product was used without further purification.

**Amide coupling.** To a solution of the product from Saponification (1 eq.) in THF (0.2 M) was added *N*-methylmorpholine (1.4 eq.). This mixture was cooled to 0 °C and isobutyl chloroformate (1.2 eq.) was added dropwise. This mixture was stirred at 0 °C for 15 min. After this point, a solution of *N,N*-tert-butoxycarbonyl-3,4-difluorobenzene-1,2-diamine (1.2 eq.) in THF (0.2 M) was added at 0 °C then heated to 50 °C overnight. The cooled reaction mixture was concentrated under reduced pressure and then the crude product was partially purified by flash chromatography to give the final product as a TFA salt (**G-11**).

**Cyclization of Substituted Glycine Derivatives to Benzimidazoles.** To a mixture of the starting material **G-11** in 4 M HCl in dioxane (0.2 M) was added 4 M HCl in water (0.2 M) This mixture was stirred until the complete removal of all Boc protecting groups was observed by LCMS. After drying under reduced pressure, acetic acid is added, and the mixture is heated to 70 °C overnight. The cooled reaction mixture was concentrated under reduced pressure and then purified by HPLC to give the final product.

**N-((4,5-difluoro-1H-benzo[d]imidazol-2-yl)methyl)-9-(isoquinolin-3-yl)-2-morpholino-9H-purin-6-amine (SR-4931)**

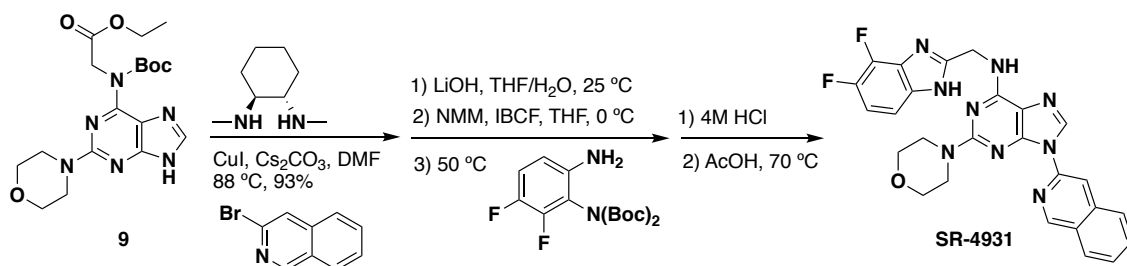

Synthesized according to the general procedure E with 3-bromoisoquinoline. <sup>1</sup>H NMR (600 MHz, DMSO-*d*<sub>6</sub>, δ): 9.35 (s, 1H), 8.90 (s, 1H), 8.75 (s, 1H), 8.34 (s, 1H), 8.20 (d, *J* = 8.2 Hz, 1H), 8.18 – 8.09 (m, 1H), 7.88 – 7.81 (m, 1H), 7.69 (dd, *J* = 8.2, 6.9 Hz, 1H), 7.26 (dd, *J* = 8.8, 3.8 Hz, 1H), 7.20 (ddd, *J* = 11.1, 8.7, 7.0 Hz, 1H), 4.98 – 4.75 (m, 2H), 3.62 (s, 8H); <sup>13</sup>C NMR (151 MHz, DMSO-*d*<sub>6</sub>, δ): 159.17, 158.95, 158.72, 158.48, 156.39, 154.72, 152.60, 152.16, 150.78, 145.56 (dd, *J* = 234.0, 9.6 Hz), 144.16, 137.35, 136.05, 132.05, 131.51, 128.42, 127.69, 127.47, 126.52, 115.10, 111.44, 109.45, 108.43, 107.01, 66.46, 45.11, 39.02; HRMS (ESI-TOF) calculated for C<sub>26</sub>H<sub>22</sub>N<sub>9</sub>OF<sub>2</sub> (M+H)<sup>+</sup> 514.1915, found 514.1916.

**9-(benzo[d]thiazol-6-yl)-N-((4,5-difluoro-1H-benzo[d]imidazol-2-yl)methyl)-2-morpholino-9H-purin-6-amine (SR-4932)**

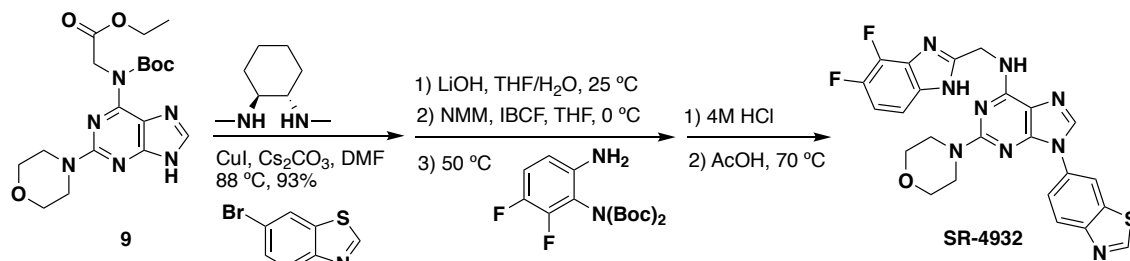

Synthesized according to the general procedure E with 6-bromobenzo[d]thiazole.  $^1\text{H}$  NMR (600 MHz,  $\text{DMSO-}d_6$ ,  $\delta$ ): 9.51 (s, 1H), 8.64 (d,  $J = 2.1$  Hz, 1H), 8.47 (s, 1H), 8.35 (d,  $J = 8.7$  Hz, 1H), 8.32 – 8.24 (m, 1H), 8.06 (dd,  $J = 8.7, 2.1$  Hz, 1H), 7.25 (dd,  $J = 8.9, 3.8$  Hz, 1H), 7.19 (ddd,  $J = 11.4, 8.7, 7.1$  Hz, 1H), 4.95 – 4.79 (m, 2H), 3.50 (d,  $J = 26.7$  Hz, 8H);  $^{13}\text{C}$  NMR (151 MHz,  $\text{DMSO-}d_6$ ,  $\delta$ ): 174.27, 159.13, 158.78, 156.43, 155.14, 154.79, 154.01, 151.27, 145.50 (dd,  $J = 234.2, 9.8$  Hz), 137.69, 134.57, 132.31, 130.08, 123.81, 120.51, 116.73, 114.57, 111.35 (d,  $J = 21.3$  Hz), 108.29 (d,  $J = 23.5$  Hz), 66.35, 44.99, 39.06; HRMS (ESI-TOF) calculated for  $\text{C}_{24}\text{H}_{20}\text{N}_9\text{OF}_2\text{S}$  ( $\text{M}+\text{H}$ ) $^+$  520.1480, found 520.1479.

**9-(benzo[b]thiophen-2-yl)-N-((4,5-difluoro-1H-benzo[d]imidazol-2-yl)methyl)-2-morpholino-9H-purin-6-amine (SR-4933)**

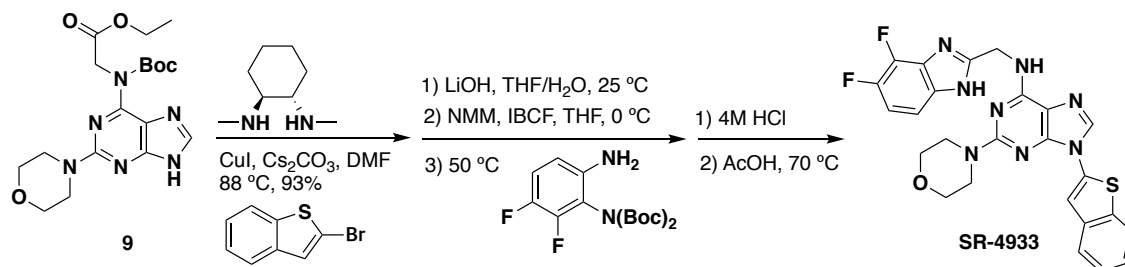

Synthesized according to the general procedure E with 2-bromobenzo[b]thiophene.  $^1\text{H}$  NMR (400 MHz,  $\text{DMSO-}d_6$ ,  $\delta$ ): 8.53 (d,  $J = 9.5$  Hz, 1H), 8.42 (s, 1H), 8.00 (d,  $J = 7.9$  Hz, 1H), 7.83 (d,  $J = 6.7$  Hz, 2H), 7.38 (dt,  $J = 23.7, 7.4$  Hz, 2H), 7.24 (ddt,  $J = 20.0, 11.3, 6.2$  Hz, 2H), 4.89 (s, 2H), 3.55 (d,  $J = 32.1$  Hz, 8H);  $^{13}\text{C}$  NMR (151 MHz,  $\text{DMSO-}d_6$ ,  $\delta$ ): 159.10, 156.32, 154.69, 150.58, 145.61 (dd,  $J = 234.3, 9.8$  Hz), 139.57 (dd,  $J = 249.1, 13.9$  Hz), 137.66, 136.60, 136.40, 136.31, 134.38, 130.27, 125.54, 124.86 (d,  $J = 2.9$  Hz), 123.77, 122.87, 117.28, 115.34, 113.69 (d,  $J = 22.6$  Hz), 112.24, 111.65 (d,  $J = 20.9$  Hz), 108.60, 66.36, 45.01, 38.99; HRMS (ESI-TOF) calculated for  $\text{C}_{25}\text{H}_{21}\text{N}_8\text{OF}_2\text{S}$  ( $\text{M}+\text{H}$ ) $^+$  519.1527, found 519.1526.



**N-((6,7-difluoro-1H-benzo[d]imidazol-2-yl)methyl)-9-(3-methoxyphenethyl)-2-morpholino-9H-purin-6-amine (SR-3452)**

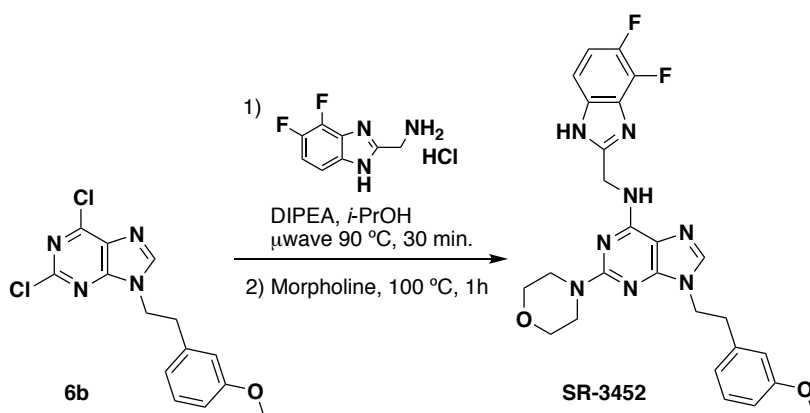

Synthesized according to general procedure D from **6b** (heating in oil bath for 60 min) in 70% yield as a white solid. <sup>1</sup>H NMR (400 MHz, DMSO-*d*<sub>6</sub>, δ): 8.20 (s, 1H), 7.97 (s, 1H), 7.32 – 7.11 (m, 3H), 6.80 – 6.67 (m, 3H), 4.84 (s, 2H), 4.31 (t, *J* = 7.1 Hz, 2H), 3.51 (m, 8H), 3.69 (s, 3H), 3.09 (t, *J* = 7.1 Hz, 2H); <sup>13</sup>C NMR (151 MHz, DMSO-*d*<sub>6</sub>, δ): 159.76, 158.84 (d, *J* = 36.0 Hz), 156.14, 152.29 (d, *J* = 327.7 Hz), 145.68 (d, *J* = 234.8 Hz), 140.38, 139.93, 138.55, 134.30, 129.95, 121.36, 117.27, 115.33, 114.71, 112.46, 111.83 (d, *J* = 20.9 Hz), 108.80, 66.33, 55.33, 44.95, 44.67, 38.90, 35.17; HRMS (ESI-TOF) calculated for C<sub>26</sub>H<sub>27</sub>N<sub>8</sub>O<sub>2</sub>F<sub>2</sub> (M+H)<sup>+</sup> 521.2225, found 521.2244.

**9-(3-bromophenethyl)-N-((6,7-difluoro-1H-benzo[d]imidazol-2-yl)methyl)-2-morpholino-9H-purin-6-amine (SR-3454)**

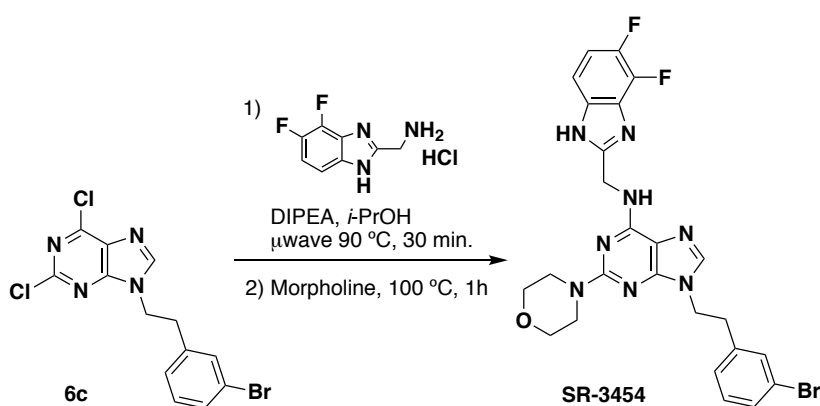

Synthesized according to general procedure D from **6c** (heating in oil bath for 60 min) in 63% yield as a white solid. <sup>1</sup>H NMR (400 MHz, DMSO-*d*<sub>6</sub>, δ): 8.20 (s, 1H), 7.99 (s, 1H), 7.46 (t, *J* = 1.8 Hz, 1H), 7.39 (ddd, *J* = 7.9, 2.1, 1.1 Hz, 1H), 7.32 – 7.16 (m, 3H), 7.11 (dt, *J* = 7.6, 1.3 Hz, 1H), 4.84 (s, 2H), 4.32 (t, *J* = 7.0 Hz, 2H), 3.50 (s, 8H), 3.12 (t, *J* = 7.0 Hz, 2H); <sup>13</sup>C NMR (151 MHz, DMSO-*d*<sub>6</sub>, δ): 159.76, 159.20, 158.96, 158.72, 156.14, 152.29 (d, *J* = 327.7 Hz), 145.68 (d, *J* = 234.8 Hz), 140.38, 139.93, 138.55, 134.30,

129.95, 121.36, 117.27, 115.33, 114.71, 112.46, 111.83 (d,  $J = 20.9$  Hz), 108.80, 66.33, 55.33, 44.95, 44.67, 38.90, 35.17; HRMS (ESI-TOF) calculated for  $C_{25}H_{24}N_8OF_2Br$  ( $M+H$ )<sup>+</sup> 569.1225, found 569.1239.

**4-(2-(6-(((6,7-difluoro-1H-benzo[d]imidazol-2-yl)methyl)amino)-2-morpholino-9H-purin-9-yl)ethyl)benzonitrile (SR-4114)**

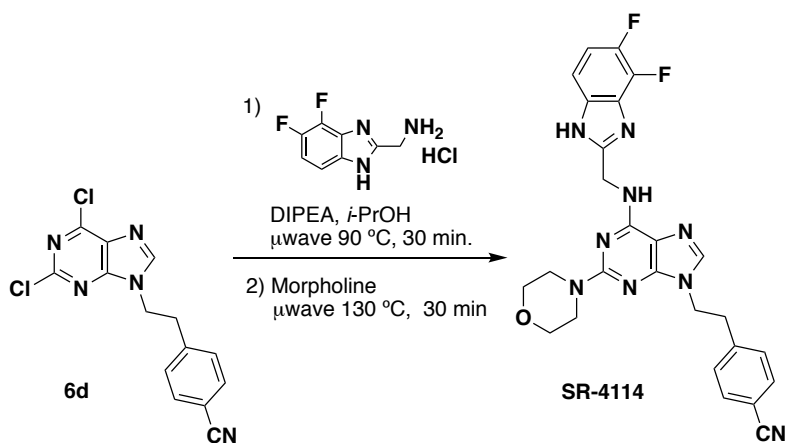

Synthesized according to general procedure D from **6d** in 60% yield as a white solid. <sup>1</sup>H NMR (400 MHz, DMSO-*d*<sub>6</sub>,  $\delta$ ): 8.16 (s, 1H), 7.91 (s, 1H), 7.72 (d,  $J = 8.3$  Hz, 2H), 7.38 – 7.31 (m, 2H), 7.31 – 7.16 (m, 2H), 4.83 (s, 2H), 4.34 (t,  $J = 6.8$  Hz, 2H), 3.49 (s, 8H), 3.21 (t,  $J = 6.9$  Hz, 2H); <sup>13</sup>C NMR (151 MHz, DMSO-*d*<sub>6</sub>,  $\delta$ ): 158.74, 158.50, 158.30 (d,  $J = 9.9$  Hz), 158.03, 155.76, 153.09, 150.85, 145.18 (dd,  $J = 234.4, 9.8$  Hz), 144.18, 138.11, 133.84, 132.29, 129.90, 118.87, 116.86, 114.92, 111.32 (d,  $J = 20.8$  Hz), 109.39, 108.28, 65.89, 44.46, 43.65, 38.42, 34.92; HRMS (ESI-TOF) calculated for  $C_{26}H_{24}N_9OF_2$  ( $M+H$ )<sup>+</sup> 516.2072, found 516.2065.

**N-(((6,7-difluoro-1H-benzo[d]imidazol-2-yl)methyl)-2-morpholino-9-(4-(trifluoromethyl)phenethyl)-9H-purin-6-amine (SR-4116)**

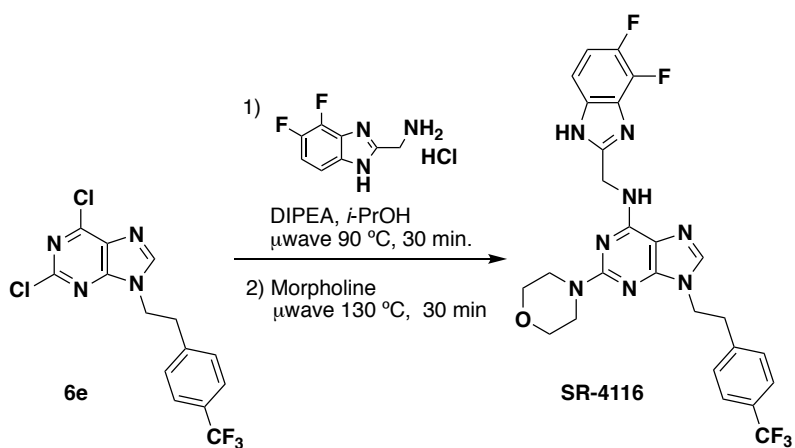

Synthesized according to general procedure D from **6e** in 75% yield as a white solid.  $^1\text{H}$  NMR (400 MHz, DMSO-*d*<sub>6</sub>,  $\delta$ ): 8.15 (s, 1H), 7.90 (s, 1H), 7.62 (d,  $J = 8.1$  Hz, 2H), 7.37 (d,  $J = 8.0$  Hz, 2H), 7.31 – 7.15 (m, 2H), 4.82 (s, 2H), 4.34 (t,  $J = 7.0$  Hz, 2H), 3.49 (s, 8H), 3.22 (t,  $J = 7.0$  Hz, 2H);  $^{13}\text{C}$  NMR (151 MHz, DMSO-*d*<sub>6</sub>,  $\delta$ ): 158.66, 158.43, 155.78, 153.10, 150.86, 145.18 (dd,  $J = 234.6, 9.4$  Hz), 143.05, 138.15, 133.86, 129.61, 127.61 – 126.76 (m), 125.24 (d,  $J = 3.7$  Hz), 123.45, 121.65, 117.03, 115.09, 114.30, 113.15, 111.29 (d,  $J = 21.1$  Hz), 108.27, 65.88, 44.48, 43.85, 38.45, 34.65; HRMS (ESI-TOF) calculated for  $\text{C}_{26}\text{H}_{24}\text{N}_8\text{OF}_5$  (M+H)<sup>+</sup> 559.1993, found 559.2005.

**N-((6,7-difluoro-1H-benzo[d]imidazol-2-yl)methyl)-2-morpholino-9-(3-(trifluoromethyl)phenethyl)-9H-purin-6-amine (SR-4134)**

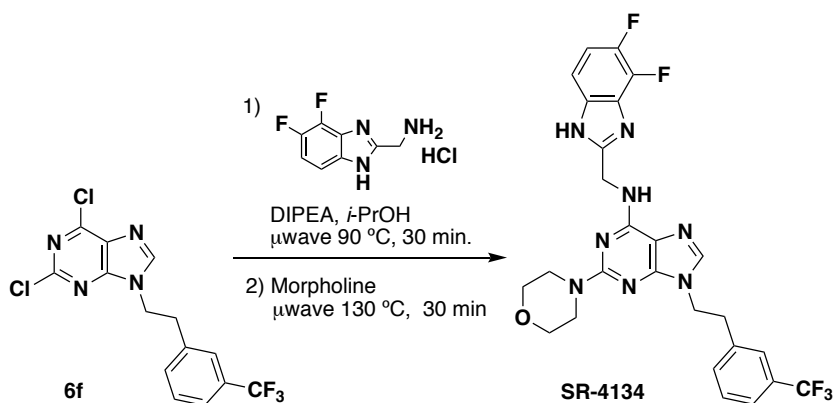

Synthesized according to general procedure D from **6f** in 72% yield as a white solid. <sup>1</sup>H NMR (400 MHz, DMSO-*d*<sub>6</sub>, δ): 8.13 (s, 1H), 7.90 (s, 1H), 7.56 (d, *J* = 10.8 Hz, 2H), 7.52 – 7.39 (m, 2H), 7.30 – 7.15 (m, 2H), 4.82 (s, 2H), 4.34 (t, *J* = 7.0 Hz, 2H), 3.49 (s, 8H), 3.22 (t, *J* = 7.0 Hz, 2H); <sup>13</sup>C NMR (151 MHz, DMSO-*d*<sub>6</sub>, δ): 158.41, 155.80, 153.08, 146.00, 145.93, 144.44, 144.38, 139.3, 139.54, 138.24, 133.85, 132.97, 129.46, 129.39, 129.25, 129.04, 128.84, 126.94, 125.36, 125.32, 125.13, 123.32, 123.28, 121.52, 111.40, 111.26, 108.31, 65.87, 63.32, 44.46, 43.85, 42.84, 40.03, 38.44, 34.59; HRMS (ESI-TOF) calculated for C<sub>26</sub>H<sub>24</sub>N<sub>8</sub>OF<sub>5</sub> (M+H)<sup>+</sup> 559.1993, found 559.1992.

**9-(3-chlorophenethyl)-N-((6,7-difluoro-1H-benzo[d]imidazol-2-yl)methyl)-2-morpholino-9H-purin-6-amine (SR-4152)**

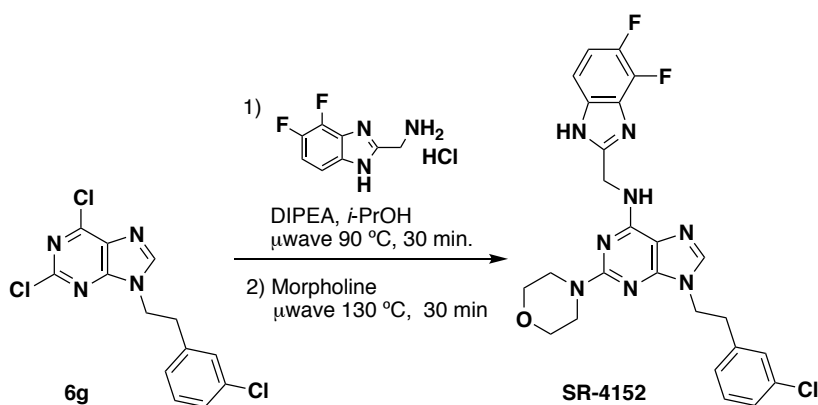

Synthesized according to general procedure D from **6g** in 63% yield as a white solid. <sup>1</sup>H NMR (400 MHz, DMSO-*d*<sub>6</sub>, δ): 8.17 (s, 1H), 7.94 (s, 1H), 7.34 – 7.13 (m, 5H), 7.13 – 7.04 (m, 1H), 4.83 (s, 2H), 4.32 (t, *J* = 7.0 Hz, 2H), 3.50 (s, 8H), 3.13 (t, *J* = 7.0 Hz, 2H); <sup>13</sup>C NMR (151 MHz, DMSO-*d*<sub>6</sub>, δ): 158.96, 158.72,

158.49, 158.25, 155.72, 152.92, 150.77, 145.22 (dd,  $J = 234.8, 9.4$  Hz), 140.57, 139.85 (d,  $J = 15.5$  Hz), 138.07, 133.77, 133.05, 130.22, 129.46, 128.63, 128.49, 127.50, 126.56, 111.40 (d,  $J = 21.5$  Hz), 110.54, 108.33, 65.90, 44.48, 43.91, 38.43, 34.43; HRMS (ESI-TOF) calculated for  $C_{25}H_{24}N_8OF_2Cl$  (M+H)<sup>+</sup> 525.1730, found 525.1755.

**N-((6,7-difluoro-1H-benzo[d]imidazol-2-yl)methyl)-9-(4-fluorophenethyl)-2-morpholino-9H-purin-6-amine (SR-4051)**

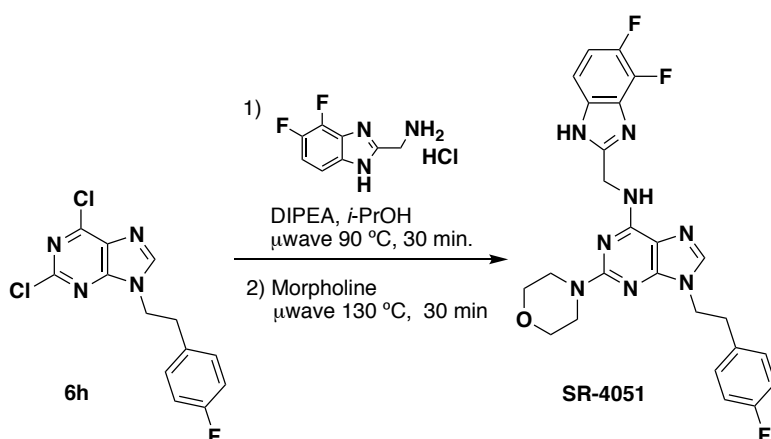

Synthesized according to general procedure D from **6h** in 80% yield as a white solid. <sup>1</sup>H NMR (400 MHz, DMSO-*d*<sub>6</sub>, δ): 8.18 (s, 1H), 7.92 (s, 1H), 7.31 – 7.13 (m, 4H), 7.13 – 7.03 (m, 2H), 4.83 (s, 2H), 4.29 (t,  $J = 7.0$  Hz, 2H), 3.51 (s, 9H), 3.10 (t,  $J = 7.1$  Hz, 2H); <sup>13</sup>C NMR (151 MHz, DMSO-*d*<sub>6</sub>, δ): 162.30, 160.69, 159.40, 159.17, 158.93, 158.70, 156.13, 153.29, 151.17, 145.67 (dd,  $J = 234.8, 9.7$  Hz), 139.43 (d,  $J = 274.6$  Hz), 134.54, 134.20, 131.02 (d,  $J = 8.4$  Hz), 129.86, 117.38, 115.63 (d,  $J = 20.9$  Hz), 111.86 (d,  $J = 21.0$  Hz), 110.73, 108.79, 66.33, 44.92, 38.88, 34.37; HRMS (ESI-TOF) calculated for  $C_{25}H_{24}N_8OF_3$  (M+H)<sup>+</sup> 509.2025, found 509.2022.

**N-((6,7-difluoro-1H-benzo[d]imidazol-2-yl)methyl)-9-(4-(methylthio)phenethyl)-2-morpholino-9H-purin-6-amine (SR-4052)**

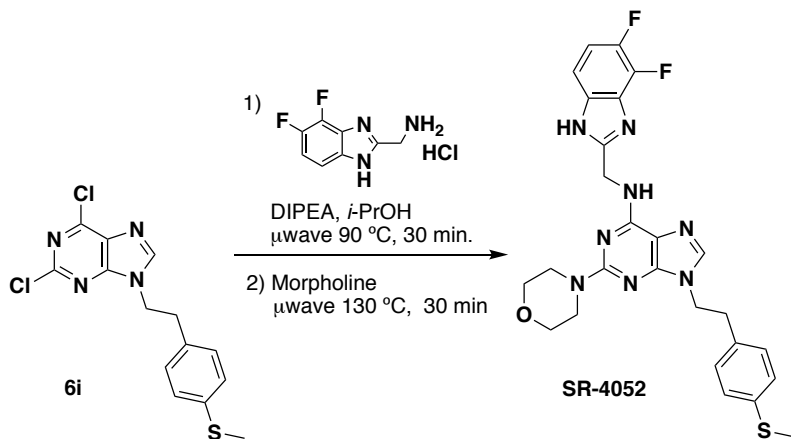

Synthesized according to general procedure D from **6i** in 60% yield as a white solid.  $^1\text{H}$  NMR (400 MHz,  $\text{DMSO-}d_6$ ,  $\delta$ ): 8.16 (s, 1H), 7.91 (s, 1H), 7.31 – 7.17 (m, 2H), 7.20 – 7.05 (m, 4H), 4.83 (s, 2H), 4.28 (t,  $J$  = 6.9 Hz, 2H), 3.51 (s, 8H), 3.07 (t,  $J$  = 7.1 Hz, 2H), 2.42 (s, 3H);  $^{13}\text{C}$  NMR (151 MHz,  $\text{DMSO-}d_6$ ,  $\delta$ ): 159.42, 159.18, 158.94, 158.70, 156.08, 153.14, 151.11, 145.70 (dd,  $J$  = 235.2, 9.8 Hz), 138.48, 136.53, 134.93, 134.16, 129.78, 126.56, 117.33, 115.40, 111.94 (d,  $J$  = 21.4 Hz), 110.27, 108.85, 66.32, 44.91, 38.87, 34.58, 15.20; HRMS (ESI-TOF) calculated for  $\text{C}_{26}\text{H}_{27}\text{N}_8\text{OF}_2\text{S}$  ( $\text{M}+\text{H}$ ) $^+$  537.1997, found 537.2012.

**N-((6,7-difluoro-1H-benzo[d]imidazol-2-yl)methyl)-9-(2-(furan-3-yl)ethyl)-2-morpholino-9H-purin-6-amine (SR-4053)**

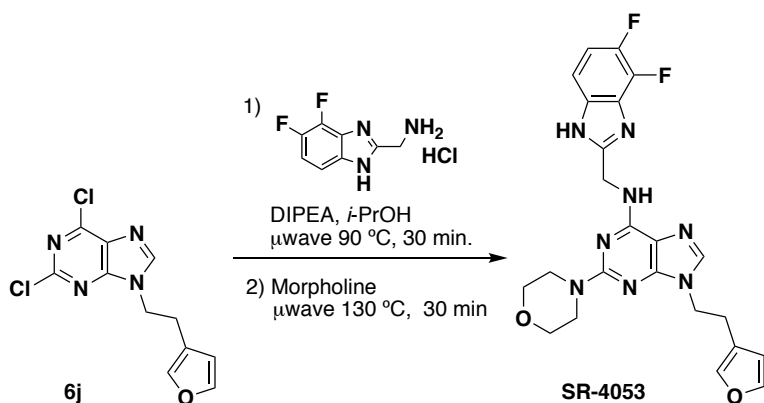

Synthesized according to general procedure D from **6j** in 80% yield as a white solid.  $^1\text{H}$  NMR (400 MHz,  $\text{DMSO-}d_6$ ,  $\delta$ ): 8.19 (s, 1H), 8.00 (s, 1H), 7.57 (t,  $J$  = 1.7 Hz, 1H), 7.45 – 7.40 (m, 1H), 7.31 – 7.15 (m, 2H), 6.36 (dd,  $J$  = 1.8, 0.9 Hz, 1H), 4.84 (s, 2H), 4.26 (t,  $J$  = 7.0 Hz, 2H), 3.51 (m, 8H), 2.94 (t,  $J$  = 6.9 Hz, 2H);

$^{13}\text{C}$  NMR (151 MHz,  $\text{DMSO-}d_6$ ,  $\delta$ ): 159.42, 159.18, 158.94, 158.70, 156.08, 153.14, 151.11, 145.70 (dd,  $J = 235.2$ , 9.8 Hz), 138.48, 136.53, 134.93, 134.16, 129.78, 126.56, 117.33, 115.40, 111.94 (d,  $J = 21.4$  Hz), 110.27, 108.85, 66.32, 44.91, 38.87, 34.58, 15.20; HRMS (ESI-TOF) calculated for  $\text{C}_{23}\text{H}_{23}\text{N}_8\text{O}_2\text{F}_2$  ( $\text{M}+\text{H}$ ) $^+$  481.1912, found 481.1898.

**N-((6,7-difluoro-1H-benzo[d]imidazol-2-yl)methyl)-2-morpholino-9-(2-(thiophen-3-yl)ethyl)-9H-purin-6-amine (SR-4054)**

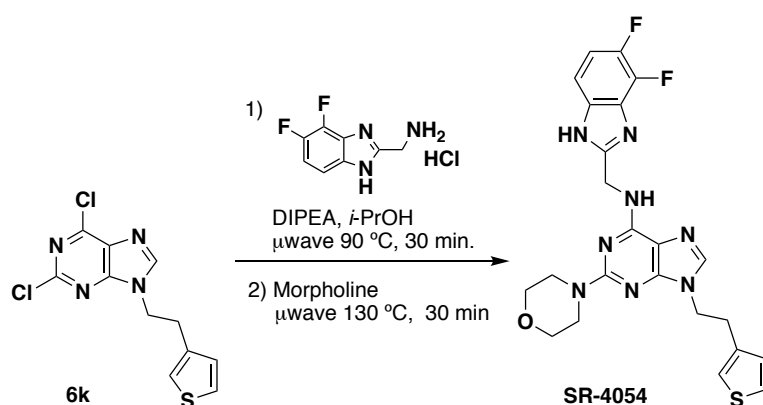

Synthesized according to general procedure D from **6k** in 70% yield as a white solid.  $^1\text{H}$  NMR (400 MHz,  $\text{DMSO-}d_6$ ,  $\delta$ ): 8.19 (s, 1H), 7.97 (s, 1H), 7.47 (dd,  $J = 4.9$ , 2.9 Hz, 1H), 7.32 – 7.15 (m, 3H), 6.97 (dd,  $J = 4.9$ , 1.3 Hz, 1H), 4.84 (s, 2H), 4.32 (t,  $J = 7.1$  Hz, 2H), 3.51 (m, 8H), 3.14 (t,  $J = 7.1$  Hz, 2H);  $^{13}\text{C}$  NMR (151 MHz,  $\text{DMSO-}d_6$ ,  $\delta$ ): 158.97, 158.73, 158.49, 158.25, 155.65, 152.70, 150.65, 145.28 (dd,  $J = 235.1$ , 9.6 Hz), 138.08, 133.72, 129.26, 128.25, 126.37, 122.06, 118.80, 116.86, 114.93, 112.99, 111.54 (d,  $J = 21.3$  Hz), 109.73, 108.43, 65.89, 44.49, 43.79, 38.44, 29.38; HRMS (ESI-TOF) calculated for  $\text{C}_{23}\text{H}_{23}\text{N}_8\text{OF}_2\text{S}$  ( $\text{M}+\text{H}$ ) $^+$  497.1684, found 497.1684.

**4-(2-(6-(((6,7-difluoro-1H-benzo[d]imidazol-2-yl)methyl)amino)-2-morpholino-9H-purin-9-yl)ethyl)phenol (SR-4055)**

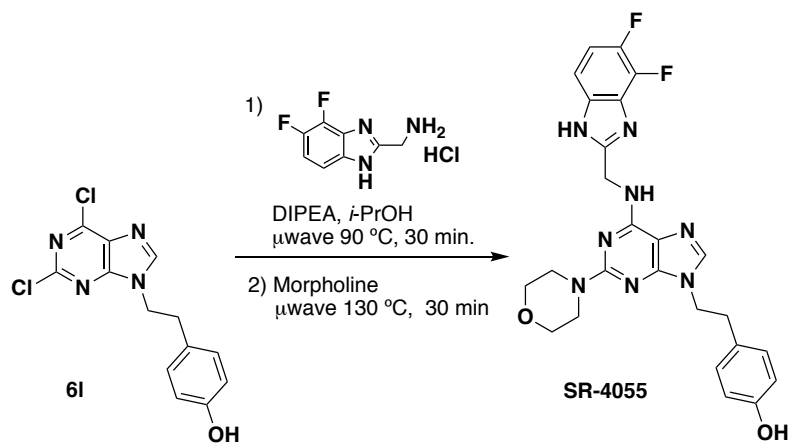

Synthesized according to general procedure D from **6l** in 55% yield as a white solid.  $^1\text{H}$  NMR (400 MHz,  $\text{DMSO-}d_6$ ,  $\delta$ ): 9.22 (s, 1H), 8.19 (s, 1H), 7.95 (s, 1H), 7.31 – 7.16 (m, 2H), 6.98 – 6.90 (m, 2H), 6.69 – 6.60 (m, 2H), 4.84 (s, 2H), 4.24 (t,  $J = 7.1$  Hz, 2H), 3.51 (m, 8H), 2.98 (t,  $J = 7.2$  Hz, 2H);  $^{13}\text{C}$  NMR (151 MHz,  $\text{DMSO-}d_6$ ,  $\delta$ ): 159.36, 159.12, 158.89, 158.66, 156.45, 156.06, 153.13, 151.06, 145.66 (dd,  $J = 234.7, 9.6$  Hz), 140.57 – 137.50 (m), 134.27, 130.07, 128.22, 117.41, 115.72, 115.47, 111.84 (d,  $J = 20.7$  Hz), 110.17, 108.79, 66.33, 45.29, 44.92, 38.91, 34.37; HRMS (ESI-TOF) calculated for  $\text{C}_{25}\text{H}_{25}\text{N}_8\text{O}_2\text{F}_2$  ( $\text{M}+\text{H}$ ) $^+$  507.2069, found 507.2067.



HPLC trace for SR-4133

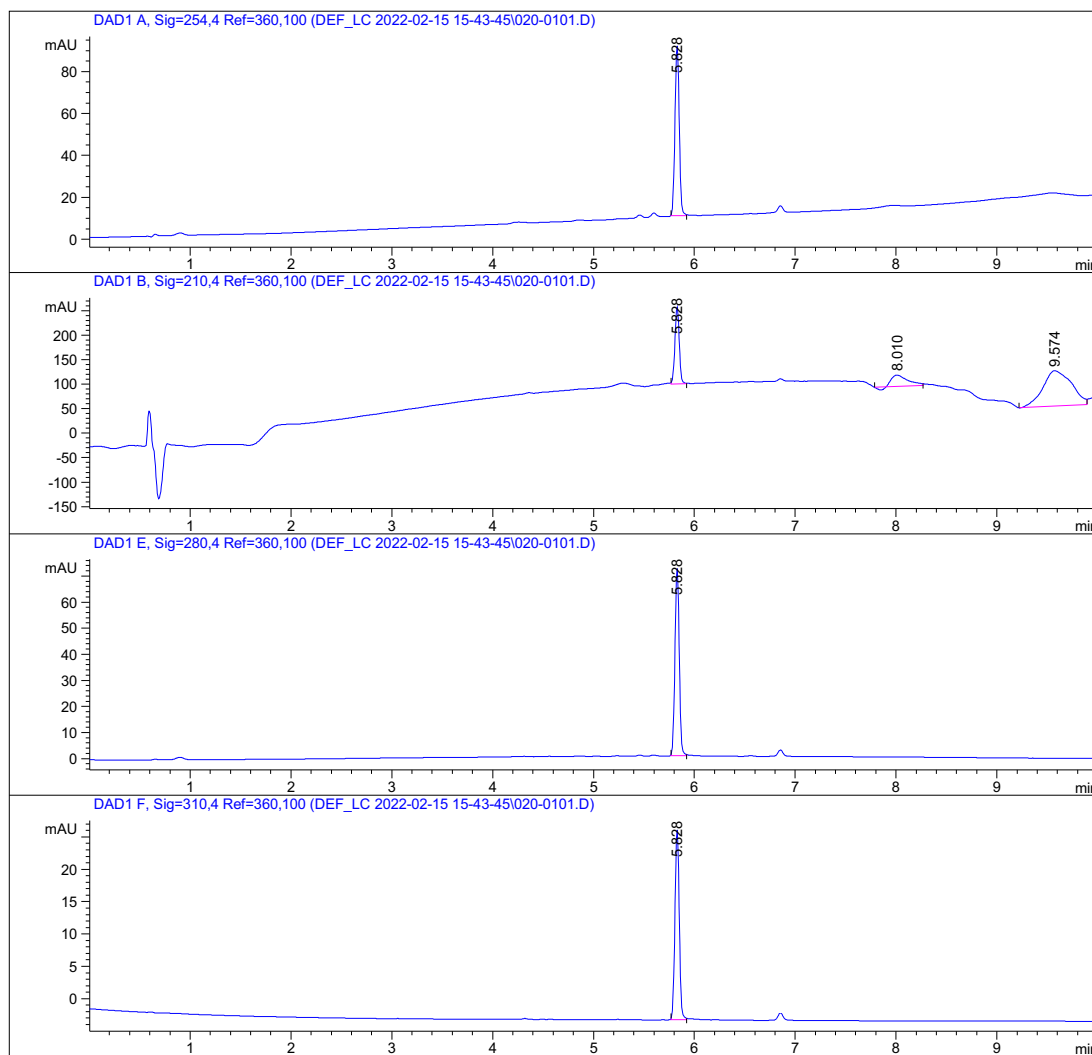

Instrument 1 2/15/2022 4:59:43 PM

Page 1 of 2

## Molecular Formula Strings

| Molecule Name | SMILES String                                                                              |
|---------------|--------------------------------------------------------------------------------------------|
| SR-3029a      | <chem>FC(C=C1)=C(F)C2=C1NC(CNC3=NC(N4CCOCC4)=NC5=C3N=CN5C6=CC=CC(F)=C6)=N2</chem>          |
| SR-4132       | <chem>FC(C=C1)=C(F)C2=C1NC(CNC3=NC(N4CCOCC4)=NC5=C3N=CN5C6=CC=CC7=C6C=CC=C7)=N2</chem>     |
| SR-4133       | <chem>FC(C=C1)=C(F)C2=C1NC(CNC3=NC(N4CCOCC4)=NC5=C3N=CN5C6=CC=C(C=CC=C7)C7=C6)=N2</chem>   |
| SR-4310       | <chem>COC(C=C1)=CC=C1N(C=N2)C3=C2C(NCC4=NC(C(F)=C(F)C=C5)=C5N4)=NC(N6CCOCC6)=N3</chem>     |
| SR-19840      | <chem>FC(C=C1)=C(F)C2=C1NC(CNC3=NC(N4CCOCC4)=NC5=C3N=CN5C6=CC=C(OC(C)C)C=C6)=N2</chem>     |
| SR-19841      | <chem>FC(C=C1)=C(F)C2=C1NC(CNC3=NC(N4CCOCC4)=NC5=C3N=CN5C6=CC=C(OCCO7)C7=C6)=N2</chem>     |
| SR-4932       | <chem>FC(C=C1)=C(F)C2=C1NC(CNC3=NC(N4CCOCC4)=NC5=C3N=CN5C6=CC=C(N=CS7)C7=C6)=N2</chem>     |
| SR-4971       | <chem>FC(C=C1)=C(F)C2=C1NC(CNC3=NC(N4CCOCC4)=NC5=C3N=CN5C6=CN=C(C=CC=C7)C7=C6)=N2</chem>   |
| SR-4931       | <chem>FC(C=C1)=C(F)C2=C1NC(CNC3=NC(N4CCOCC4)=NC5=C3N=CN5C6=NC=C(C=CC=C7)C7=C6)=N2</chem>   |
| SR-4933       | <chem>FC(C=C1)=C(F)C2=C1NC(CNC3=NC(N4CCOCC4)=NC5=C3N=CN5C6=CC(C=CC=C7)=C7S6)=N2</chem>     |
| SR-3448       | <chem>FC(C=C1)=C(F)C2=C1NC(CNC3=NC(N4CCOCC4)=NC5=C3N=CN5CC6=CC=CC(F)=C6)=N2</chem>         |
| SR-3449       | <chem>FC(C=C1)=C(F)C2=C1NC(CNC3=NC(N4CCOCC4)=NC5=C3N=CN5CC6=CC=CC7=C6C=CC=C7)=N2</chem>    |
| SR-3450       | <chem>FC(C=C1)=C(F)C2=C1NC(CNC3=NC(N4CCOCC4)=NC5=C3N=CN5CC6=CC=C(C=CC=C7)C7=C6)=N2</chem>  |
| SR-3451       | <chem>FC(C=C1)=C(F)C2=C1NC(CNC3=NC(N4CCOCC4)=NC5=C3N=CN5CCC6=CC=CC(F)=C6)=N2</chem>        |
| SR-4290       | <chem>FC(C=C1)=C(F)C2=C1NC(CNC3=NC(N4CCOCC4)=NC5=C3N=CN5CCC6=CC(F)=CC(F)=C6)=N2</chem>     |
| SR-3452       | <chem>FC(C=C1)=C(F)C2=C1NC(CNC3=NC(N4CCOCC4)=NC5=C3N=CN5CCC6=CC=CC(OC)=C6)=N2</chem>       |
| SR-3454       | <chem>FC(C=C1)=C(F)C2=C1NC(CNC3=NC(N4CCOCC4)=NC5=C3N=CN5CCC6=CC=CC(Br)=C6)=N2</chem>       |
| SR-4114       | <chem>FC(C=C1)=C(F)C2=C1NC(CNC3=NC(N4CCOCC4)=NC5=C3N=CN5CCC6=CC=C(C#N)C=C6)=N2</chem>      |
| SR-4116       | <chem>FC(C=C1)=C(F)C2=C1NC(CNC3=NC(N4CCOCC4)=NC5=C3N=CN5CCC6=CC=C(C(F)(F)F)C=C6)=N2</chem> |
| SR-4134       | <chem>FC(C=C1)=C(F)C2=C1NC(CNC3=NC(N4CCOCC4)=NC5=C3N=CN5CCC6=CC=CC(C(F)(F)F)=C6)=N2</chem> |
| SR-4152       | <chem>FC(C=C1)=C(F)C2=C1NC(CNC3=NC(N4CCOCC4)=NC5=C3N=CN5CCC6=CC=CC(Cl)=C6)=N2</chem>       |
| SR-4051       | <chem>FC(C=C1)=C(F)C2=C1NC(CNC3=NC(N4CCOCC4)=NC5=C3N=CN5CCC6=CC=C(F)C=C6)=N2</chem>        |
| SR-4052       | <chem>FC(C=C1)=C(F)C2=C1NC(CNC3=NC(N4CCOCC4)=NC5=C3N=CN5CCC6=CC=C(SC)C=C6)=N2</chem>       |
| SR-4053       | <chem>FC(C=C1)=C(F)C2=C1NC(CNC3=NC(N4CCOCC4)=NC5=C3N=CN5CCC6=COC=C6)=N2</chem>             |
| SR-4054       | <chem>FC(C=C1)=C(F)C2=C1NC(CNC3=NC(N4CCOCC4)=NC5=C3N=CN5CCC6=CSC=C6)=N2</chem>             |
| SR-4055       | <chem>FC(C=C1)=C(F)C2=C1NC(CNC3=NC(N4CCOCC4)=NC5=C3N=CN5CCC6=CC=C(O)C=C6)=N2</chem>        |

## References

1. Sievers, F.; Higgins, D. G., Clustal Omega for making accurate alignments of many protein sequences. *Protein Sci* **2018**, *27* (1), 135-145.
2. Sievers, F.; Wilm, A.; Dineen, D.; Gibson, T. J.; Karplus, K.; Li, W.; Lopez, R.; McWilliam, H.; Remmert, M.; Soding, J.; Thompson, J. D.; Higgins, D. G., Fast, scalable generation of high-quality protein multiple sequence alignments using Clustal Omega. *Mol Syst Biol* **2011**, *7*, 539.
3. Avery, M. A.; Alvim-Gaston, M.; Vroman, J. A.; Wu, B.; Ager, A.; Peters, W.; Robinson, B. L.; Charman, W., Structure-activity relationships of the antimalarial agent artemisinin. 7. Direct modification of (+)-artemisinin and in vivo antimalarial screening of new, potential preclinical antimalarial candidates. *J Med Chem* **2002**, *45* (19), 4321-35.
